1

2 **Necessity and contingency in developmental genetic screens: LIN-3, Wnt and**  
3 **semaphorin pathways in vulval induction of the nematode *Oscheius tipulae***

4

5

6

7 Amhed M. Vargas-Velazquez<sup>1</sup>, Fabrice Besnard<sup>1,2</sup>, and Marie-Anne Félix<sup>1\*</sup>

8

9

10

11

12 <sup>1</sup> Institut de Biologie de l'Ecole Normale Supérieure (IBENS), Ecole Normale Supérieure,  
13 CNRS, INSERM, PSL Research University, 75005 Paris, France

14 <sup>2</sup> Current address: Laboratoire Reproduction et Développement des Plantes, University of  
15 Lyon, ENS de Lyon, UCB Lyon 1, CNRS, INRA, F-69342 Lyon, France

16

17

18 \*: Correspondence: felix@biologie.ens.fr

19

20

21 **Keywords:**

22 *C. elegans*, *O. tipulae*, *lin-3*, Wnt, plexin, semaphorin, evolution of development, genetic  
23 screens

24

25 **Short title:** *Oscheius tipulae* vulva induction mutants

26 **Abstract**

27

28

29 Genetic screens in the nematode *Caenorhabditis elegans* identified the EGF/Ras and Notch  
30 pathways as central for vulval precursor cell fate patterning. Schematically, the anchor cell  
31 secretes EGF, inducing the P6.p cell to a 1° vulval fate; P6.p in turn induces its neighbors to  
32 a 2° fate through Delta-Notch signaling and represses Ras signaling. In the nematode  
33 *Oscheius tipulae*, the anchor cell successively induces 2° then 1° vulval fates. Here we report  
34 on the molecular identification of mutations affecting vulval induction in *O. tipulae*. A single  
35 Induction Vulvaless mutation was found, which we identify as a *cis*-regulatory deletion in a  
36 tissue-specific enhancer of the *O. tipulae lin-3* homolog, confirmed by CRISPR/Cas9 mutation.  
37 In contrast to this predictable Vulvaless mutation, mutations resulting in an excess of 2° fates  
38 unexpectedly correspond to the plexin/semaphorin pathway, which was not implicated in  
39 vulval fate induction in *C. elegans*. Hyperinduction of P4.p and P8.p in these mutants likely  
40 results from mispositioning of these cells due to a lack of contact inhibition. The third signaling  
41 pathway found by forward genetics in *O. tipulae* is the Wnt pathway: decrease in Wnt pathway  
42 activity results in loss of vulval precursor competence and induction, and 1° fate miscentering  
43 on P5.p. Our results suggest that the EGF and Wnt pathways have qualitatively similar  
44 activities in vulval induction in *C. elegans* and *O. tipulae*, albeit with quantitative differences in  
45 the effects of mutation. This study highlights both necessity and contingency in forward genetic  
46 screens.

47

48

49 **100-word summary**

50 Genetic screens in the nematode *Caenorhabditis elegans* identified EGF and Notch pathways  
51 as key for vulval precursor cell fate patterning. Here we report on the molecular identification  
52 of mutations affecting vulval induction in another nematode, *Oscheius tipulae*. The single  
53 mutation with reduced induction is identified as a *cis*-regulatory deletion in the *O. tipulae lin-3*  
54 homolog, confirmed by CRISPR/Cas9 mutation. In contrast to this predictable Vulvaless  
55 mutation, mutations resulting in an excess of 2° vulval fates unexpectedly correspond to the  
56 plexin/semaphorin pathway, not implicated in vulval induction in *C. elegans*. This study  
57 highlights both necessity and contingency in forward genetic screens.

58

59

## 60 Introduction

61

62 How multicellular organisms arise from single cells is a question that has intrigued scientists  
63 over ages. In the 1960s, Sydney Brenner selected *Caenorhabditis elegans* as a new model  
64 organism to study animal development using genetics (Brenner 1974). Vulva precursor cell  
65 fate patterning rapidly became one of the most studied developmental processes in *C.*  
66 *elegans*, due to the easy isolation of mutants with a defective vulva (Sternberg 2005).

67 The *C. elegans* vulva is an epidermal specialization that develops from a row of six  
68 vulva precursor cells (VPCs) in the ventral epidermis, called P3.p to P8.p from anterior to  
69 posterior. In most animals, the central vulval fate, or 1° fate, is adopted by P6.p, while the  
70 outer vulval fate, or 2° fate, is adopted by its neighbors P5.p and P7.p (Sulston and Horvitz  
71 1977; Sternberg 2005). Finally, P3.p, P4.p and P8.p are able to replace the central cells (for  
72 example if they are destroyed with a laser), but normally adopt a standard epidermal fate with  
73 one division and fusion of the daughters to the large epidermal syncytium hyp7 (Sulston and  
74 White 1980). Laser ablation of the anchor cell (AC) in the gonad primordium results in all  
75 precursor cells adopting a 3° fate, showing that the vulval fates are induced by the anchor cell  
76 (Kimble 1981).

77 Upon random chemical mutagenesis, some recurrent phenotypes were isolated with  
78 pronounced defects in vulva development, such as the Vul (Vulvaless) and Muv (Multivulva)  
79 phenotypes (Horvitz and Sulston 1980; Ferguson and Horvitz 1985). The Vulvaless mutants  
80 can be easily seen in the dissecting microscope by the internal hatching of the progeny in their  
81 mother (bag of worms). The Vulvaless mutants can be further classified in two classes, i) those  
82 that mimicked an AC ablation (cells adopting a 3° fate), or Induction Vulvaless and ii) those  
83 that prevented the development of competent vulva precursor cells, or Generation Vulvaless  
84 (Ferguson et al. 1987). The Multivulva mutants are recognized by the additional protrusions  
85 on the ventral cuticle (pseudovulvae).

86 The *C. elegans* Induction Vulvaless and the Multivulva mutants allowed the  
87 identification of the EGF/Ras/MAP kinase pathway, the former class corresponding to a loss  
88 of activity in the pathway, the latter to a gain of activity (Sternberg 2005). In addition, mutations  
89 at the *lin-12* locus affected 2° fates specifically: reduction-of-function *lin-12* alleles transformed  
90 2° fates to 1° or 3°, while gain-of-function alleles transformed 1° and 3° fates to the 2° fate  
91 (Greenwald et al. 1983). *lin-12* was shown to encode a Notch receptor, receiving Delta signals  
92 mostly produced by P6.p. Studies of the interplay between the EGF and Delta/Notch pathways  
93 in patterning vulval cell fates established this system as a textbook example of intercellular  
94 signalling and organogenesis (Sternberg and Han 1998).

95 Since the 1990s, studies of vulva development in different *Caenorhabditis* species and  
96 other nematode genera have made vulva development an emblematic example of

97 developmental system drift (DSD; True and Haag 2001): while the vulval cell fate pattern  
98 remains overall invariant ( $2^{\circ}1^{\circ}2^{\circ}$  for P5.p, P6.p and P7.p), evolution occurs in the manner in  
99 which it forms. First, the size of the competence group varies (Sternberg and Horvitz 1982;  
100 Sommer and Sternberg 1996; Félix et al. 2000a; Delattre and Félix 2001; Pénigault and Félix  
101 2011a). Second, vulval cell fate patterning does not always require the anchor cell (Sommer  
102 and Sternberg 1994; Félix et al. 2000a). Third, when it requires the gonad, ablating the anchor  
103 cell at intermediate timepoints has widely different effects depending on the species (Sommer  
104 and Sternberg 1994; Félix and Sternberg 1997; Sommer 2005; Kiontke et al. 2007; Félix and  
105 Barkoulas 2012; Félix 2012). Especially, in many genera of rhabditids and diplogastrids (Félix  
106 and Sternberg 1997; Félix and Sternberg 1998; Sigrist and Sommer 1999; Félix et al. 2000a;  
107 Félix 2007; Kiontke et al. 2007), the ablation at an intermediate timepoint results in P(5-7).p  
108 adopting a  $2^{\circ}$  fate (vs. a  $3^{\circ}$  fate for the outer cells), with no apparent differences among these  
109 three cells. This contrast with anchor cell ablation results in *C. elegans*, where no such  
110 intermediate state exists and P6.p adopts a  $1^{\circ}$  fate earlier, thereby activating lateral induction  
111 and inhibition (Félix 2007) (Fig. 1). The mode of induction where an intermediate fate is found  
112 for all cells has been called a two-step induction (Félix and Sternberg 1997). In this case, the  
113 second step of induction of the  $1^{\circ}$  fate occurs after one division round, on P6.p daughters.  
114 Signaling however may be continuous (Félix and Sternberg 1997; Sigrist and Sommer 1999;  
115 Kiontke et al. 2007).

116 Among species with a two-step induction (Fig. 1), *Oscheius tipulae* is a rhabditid  
117 nematode found in the same habitat as *C. elegans* (Félix and Duveau 2012), which can be  
118 cultured in the same laboratory conditions (Félix et al. 2000b). A genetic screen was  
119 conducted ca. 20 years ago to isolate vulva development mutants in *O. tipulae* (Dichtel et al.  
120 2001; Louvet-Vallée et al. 2003; Dichtel-Danjou and Félix 2004b; Dichtel-Danjou and Félix  
121 2004a). This genetic screen led to a different spectrum of vulval cell fate and lineage  
122 phenotypes compared to those found in *C. elegans*. This result suggested a different  
123 sensitivity of the developmental system to mutation and therefore a different evolutionary  
124 potential. It also reflected the difference in development between *O. tipulae* and *C. elegans*  
125 (Dichtel-Danjou and Félix 2004a). We then identified a null mutant in the Hox gene *lin-39*, with  
126 the same phenotype as in *C. elegans*, namely a loss of competence of the vulva precursor  
127 cells (Louvet-Vallée et al. 2003).

128 A draft of the *O. tipulae* genome has recently been published, along with a strategy to  
129 map the genomic location of loci whose mutation produces a visible phenotype (Besnard et  
130 al. 2017). As a proof of principle for the mutant identification technique, we described alleles  
131 of the *Oti-mig-13* locus with an unexpected vulva phenotype (Besnard et al. 2017). Here, we  
132 take advantage of the mapping approach to molecularly identify the collection of *O. tipulae*  
133 mutations affecting vulval cell fate patterning. We had found a single Induction Vulvaless locus

134 with a single allele and this turned out to be a *cis*-regulatory deletion in a tissue-specific  
135 enhancer of the *O. tipulae lin-3* homolog, which we confirmed by targeted CRISPR mutation  
136 of the element. We then identified mutations in Wnt pathway components (*mom-5/frizzled*,  
137 *mig-14/wingless*, and *egl-20/Wnt*) affecting fates of the *O. tipulae* vulva precursor cells, and  
138 discuss similarities and differences with *C. elegans* and *Pristionchus pacificus*, another  
139 nematode species where similar screens were conducted (Sommer 2006). Finally, the last  
140 class of vulval cell fate mutants caused an excess of 2°-fated cells. Unexpectedly, these  
141 mutations corresponded to lesions in *Oti-plx-1* and *Oti-smp-1*, encoding plexin and  
142 semaphorin, a cell signaling system that was not found in *C. elegans* vulva mutagenesis  
143 screens.

## 144 **Material and Methods**

145

### 146 **Nematode culture**

147 *C. elegans* and *O. tipulae* were handled according to usual procedures, on standard NGM  
148 plates with *Escherichia coli* strain OP50 as a food source (Brenner 1974; Félix et al. 2000b).  
149 *C. elegans* and *O. tipulae* strains were maintained respectively at 20°C and 23°C, unless  
150 otherwise indicated. N2 is used as a reference strain for *C. elegans* and CEW1, a wild isolate  
151 from Brazil, as a reference strain for *O. tipulae*. A list of strains used in this study is presented  
152 in Table S1.

153

### 154 **Mapping by sequencing and identification of molecular lesions**

155 The mapping-by-sequencing strategy has been comprehensively described before (Besnard  
156 et al. 2017). In brief, each mutant *O. tipulae* line previously obtained in the CEW1 genetic  
157 background was crossed to males of the molecularly divergent wild isolate JU170. In the case  
158 of the fully Vulvaless *iov-1(mf86)* mutant, males of strain JU432 of genotype *iov-1(mf86)*;  
159 *him(sy527)* were crossed to JU170 hermaphrodites. In all cases, individual F2 progeny with a  
160 recessive mutant phenotype were isolated and the mutant phenotype verified on the F3 brood.  
161 The pooled DNA of the progeny of mutant F2s was extracted using the Puregene Core Kit A  
162 (QIAGEN) and whole-genome sequenced at the BGI facilities. Pools from 37 to 152 individual  
163 F2s were used, depending on the ease of scoring of the mutant phenotype.

164 Sequencing reads from each mutant pool were mapped to the CEW1 genome using  
165 bwa (Li and Durbin 2009) and the resulting alignment converted to bam format using samtools  
166 (Li et al. 2009). Each mapping was further processed with the GATK suite (Van der Auwera  
167 et al. 2013) and allelic variants were called using HaplotypeCaller on a restricted list of JU170  
168 sites for faster computation. Scaffolds having a mean JU170 allele frequency of less than 10%  
169 were selected as candidates for possibly linkage with a causative locus and processed for  
170 homozygous variant calling in an unrestrictive manner. JU170 variants were filtered out from  
171 the candidate scaffolds and the remaining variants were analyzed for any functional impact  
172 on the *O. tipulae* gene annotations (CEW1\_nOt2) using snpEff (Cingolani et al. 2012). Scripts  
173 used for this processing pipeline can be found at:  
174 [https://github.com/fabfabBesnard/Andalusian Mapping](https://github.com/fabfabBesnard/Andalusian_Mapping). The candidate scaffolds were also  
175 analysed using Pindel (Ye et al. 2009) to identify large deletions or insertions, which were  
176 confirmed later by visual inspection with the Tablet software (Milne et al. 2013).

177

### 178 **Sanger sequence validation**

179 The mutations identified by the mapping-by-sequencing approach were verified by Sanger  
180 sequencing of a PCR product. When other alleles of a given locus had been identified by

181 genetic complementation screens, the gene was sequenced to find a possible lesion and in  
182 all cases we did find a lesion in the same gene. A list of primers used for sequencing can be  
183 found in Table S2.

184

### 185 **Identification of homologous genes**

186 The predicted protein sequences of *O. tipulae* genes were obtained through the genome  
187 annotation (Besnard et al. 2017), now available from the Blaxter laboratory website:  
188 <http://bang.bio.ed.ac.uk:4567>. The sequence of their closest *C. elegans* homolog was  
189 identified using the BLASTP algorithm (Gish and States 1993), conditioning for highly similar  
190 alignments (>80% identity) and low e-value. Manual curation and re-annotation of the *O.*  
191 *tipulae* gene sequences were then performed using as a reference their closest *C. elegans*  
192 homolog. We aligned the amino-acid sequences of the re-annotated genes with their  
193 respective *C. elegans* homologs and outgroups using the Muscle algorithm implemented in  
194 MEGA X (Kumar et al. 2018) with default parameters. The phylogenetic relationship between  
195 the protein sequences was inferred using the Neighbor-Joining method (Saitou and Nei 1987)  
196 and tested for bootstrapping with 1000 replicates.

197

### 198 **Nomenclature**

199 We followed *C. elegans* nomenclature and recommendations for other nematode species in  
200 Tuli et al. (2018). Briefly, mutant class names had been given at the time of our screen: *iov* for  
201 induction of the vulva; *dov*, for division of vulva precursor cells; *cov* for competence and/or  
202 centering of vulva precursor cells. Once the molecular lesion has been identified, we use the  
203 name of the *C. elegans* homolog preceded by the species prefix for *Oscheius tipulae* 'Oti-'; for  
204 example the *iov-1(mf86)* allele is thus renamed *Oti-lin-3(mf86)*.

205

### 206 **Single molecule fluorescence *in situ* hybridization (smFISH)**

207 smFISH in *O. tipulae* was performed as previously described (Barkoulas et al. 2016). Mixed-  
208 stage populations were used for mRNA localization experiment, while bleach-synchronized  
209 populations at the L3 larval stage were used for mRNA quantification. Only L3 stage  
210 nematodes with a gonad longer than 300 pixels (38.66 micrometers) were considered for  
211 mRNA quantification. The short fluorescently labelled oligos used in this study were acquired  
212 from LGC Biosearch Technologies and were used at a concentration of 100 to 200 nM. A list  
213 containing the sequences of the smFISH oligonucleotides is provided in Table S3.

214

### 215 **Phenotypic characterization and measurements of cell distances**

216 The cell fates acquired by the *O. tipulae* vulva precursor cells were scored as previously  
217 (Dichtel et al. 2001). In summary, early L4 larvae were mounted with M9 solution on 4% agar



218 pads containing 10 mM sodium azide and analyzed under Nomarski optics. Standard criteria  
219 were used to infer cell fates based on the topology and number of cells at different stages.  
220 Half fates were assigned when two daughters of the Pn.p cells acquired distinct fates after the  
221 first cell division.

222 Measurements of distances between the nuclei of Pn.p cells were performed on  
223 mounted larvae at 3 different developmental stages: L2 molt, early L3 (before the division of  
224 dorsal uterine DU cells), and mid L3 (after DU cell division and before Pn.p divisions). The  
225 distance between the center of the Pn.p and AC nuclei was measured in pixels using a  
226 Photometrics CoolSNAP ES camera and the Nikon NIS-Elements software (version 3.0.1). To  
227 avoid measurement errors due to the animal curvature, the distance between each Pn.p cell  
228 (except P6.p) and the AC was calculated via a Pythagorean formula. For example, the  
229 distance between P4.p and the AC is equal to:

$$233 \sqrt{(P6.p_{AC})^2 + (P5.p_{P4.p} + P6.p_{P5.p})^2}$$

230 Where  $P6.p_{AC}$  is the distance between P6.p and the AC,  $P5.p_{P4.p}$  is the distance between P5.p  
231 and P4.p, and  $P6.p_{P5.p}$  is the distance between P6.p and P5.p. Non-normalized  
232 measurements can be found in Table S4.

234

### 235 **Genome editing**

236 We followed the CRISPR-Cas9 target design in Paix et al. (2015). We targeted the following  
237 sequence at the *O. tipulae lin-3 cis*-regulatory region 5'-cCACCTGcatgtccttttgcg-3' (E-box  
238 site in uppercase, within an underlined NGGNGG PAM motif in the negative strand). The  
239 *mf113* allele was produced with the synthetic Oti\_lin-3\_A-2 -GCGCAAAAAGGACAUGCAGG-  
240 crRNA manufactured by Dharmacon (GE Healthcare), while *mf114* was produced with the  
241 same crRNA sequence synthesized by IDT. Each crRNA was mixed with tcRNA (Paix et al.  
242 2015) at an equimolar concentration of 200 micromoles/microliter. The tcRNA:crRNA mix was  
243 incubated in a thermal ramp between 95 and 25°C, decreasing by 5°C every two minutes, and  
244 then mixed with purified CRISPR-Cas9 protein in HEPES buffer (pH 7.4), reaching a final  
245 concentration of 30 μM of the tcRNA:crRNA duplex and ~18 μM of purified protein. The final  
246 mix was incubated for 15 minutes at 37°C and then injected into the gonad of *O. tipulae* gravid  
247 adults. The F1 progeny of the injected nematodes were placed into new plates and, after  
248 letting them lay eggs for one day, screened for deletions by PCR with the mf86-EboxA-F and  
249 mf86-R primers. Heterozygous F1 animals were identified by band-size separation on 3%  
250 agarose gels, and homozygous F2 mutants were easily spotted by their bag phenotype. Only  
251 a single mutation per injection session (> 10 P0s and > 200 F1s) was obtained.

252

### 253 **Immunofluorescence staining**



254 Bleach-synchronized larvae and mixed-stage populations were fixed and permeabilized for  
255 immunostaining using previously described methods (Louvet-Vallée et al. 2003; Kolotuev and  
256 Podbilewicz 2004; Kolotuev and Podbilewicz 2008). In brief, OP50-grown populations were  
257 washed 3 times in distilled water and placed onto poly-L-lysine-coated (SIGMA P0425-72EA)  
258 slides prior to freeze-cracking. Worms with an open cuticle were incubated in antibody buffer  
259 with the mouse MH27 antibody against the epithelial cell adherent junctions (Francis and  
260 Waterston 1991). This antibody was obtained from the DHSB and used at a concentration of  
261 1 mg/mL. As secondary antibody, we used the goat anti-mouse antibody from Abcam labelled  
262 fluorescently with Alexa Fluor 488 (ref. #ab150113). The slides containing  
263 immunofluorescently labelled worms were mounted with GLOX buffer (Ji and van  
264 Oudenaarden 2012) containing DAPI, covered with a cover slip, and imaged with a PIXIS  
265 camera (Princeton Instruments).

266

### 267 **Data and reagent availability**

268 Supplementary Tables are available through the FigShare portal:

269 - Table S1. List of strains used in this study.

270 - Table S2. Sequences of DNA primers used in this study. Sequencing primers to verify by  
271 Sanger sequencing the mutations identified by the mapping by sequencing approach, and to  
272 identify the molecular lesion in additional alleles.

273 - Table S3. Sequences of smFISH probes used in this study. The fluorophore coupled to each  
274 probe is noted at the end of the set name.

275 - Table S4. smFISH quantifications, distance measurements and vulval cell fates used in this  
276 study.

277 Data and strains are available by contacting Marie-Anne Félix ([felix@biologie.ens.fr](mailto:felix@biologie.ens.fr)). Code  
278 for mutant identification is available at  
279 [https://github.com/fabfabBesnard/Andalusian\\_Mapping](https://github.com/fabfabBesnard/Andalusian_Mapping).

## 280 Results

281

### 282 The sole hypoinduction mutation is due to a *cis*-regulatory change in *Oti-lin-3*

283 Our prior mutagenesis screens had yielded a single mutant with an Induction Vulvaless  
284 phenotype, i.e. the 1° and 2° fates are transformed to a 3° fate (two rounds of division and  
285 fusion to the hyp7 syncytium, represented in yellow in the figures) but rarely to a non-  
286 competent state (fusion to hyp7 without division, prior to the L3 stage, represented in grey)  
287 (Dichtel-Danjoy and Félix 2004b). This allele, *iov-1(mf86)*, was obtained after TMP-UV  
288 (trimethylpsoralene-ultraviolet) mutagenesis. The mapping-by-sequencing approach  
289 identified a 191 bp deletion upstream of the coding sequence (second ATG) of *O. tipulae lin-*  
290 *3 (Oti-lin-3)* (Fig. 2B). We hypothesized that this deletion may cause a reduced level of  
291 expression in *Oti-lin-3* and thus performed single molecule Fluorescent In Situ Hybridization  
292 (smFISH) experiments to quantify *Oti-lin-3* mRNA number (Raj et al. 2008; Barkoulas et al.  
293 2013; Barkoulas et al. 2016). Indeed, the *Oti-lin-3* mRNA level in the anchor cell was much  
294 decreased in animals bearing the *Oti-lin-3(mf86)* deletion compared to animals of the CEW1  
295 reference strain (Fig. 2C, Kolmogorov-Smirnov test,  $p < 10^{-9}$ ). The deleted region in *Oti-lin-*  
296 *3(mf86)* contains an E-box motif known to be conserved in *Caenorhabditis* species (Fig. 2B)  
297 (Barkoulas et al. 2016), as well as a second less characteristic putative E-box motif.

298 To test whether the conserved E-box motif was required for the expression of *Oti-lin-*  
299 *3* and also confirm that the 191 bp deletion was causal for the vulva phenotype, we performed  
300 a CRISPR/Cas9 experiment specifically targeting this site. We obtained two new mutations, a  
301 smaller 12 bp deletion (*mf113*) and a one-bp insertion in the E-box (*mf114*). Both showed a  
302 strong decrease in the level of induction, confirming that the lesion in the *Oti-lin-3* gene is  
303 causal for the phenotype (Fig. 2A, Table S4). Further smFISH experiments in the *Oti-lin-*  
304 *3(mf113)* mutant revealed a similar level of mRNAs as in the *Oti-lin-3(mf86)* mutant  
305 (Kolmogorov-Smirnov test non-significant,  $p = 0.94$ ). We conclude that the conserved E-box  
306 site is also required in *O. tipulae* for *lin-3* expression and that LIN-3 secreted from the anchor  
307 cell is necessary for induction of both 2° and 1° fates.

308

### 309 The Wnt pathway plays a role in vulva precursor competence/induction and fate pattern 310 centering

311 A large class of mutants in our screen displayed a lower number of competent Pn.p cells  
312 (transformation to 4°/grey fate) and a displacement of the 1° fate from P6.p to P5.p. In *C.*  
313 *elegans*, this phenotype has not been seen at this high level of penetrance. The mapping-by-  
314 sequencing approach had already identified one locus in this class as *Oti-mig-13* (Besnard et  
315 al. 2017). We further identified in this class mutations in two Wnt pathway components:

316 i) a Wnt receptor gene, *Oti-mom-5* (supported by two alleles, including an early stop)  
317 (Fig. 3B). Relationships among Wnt receptors paralogs in the different species is shown in  
318 Fig. S4. Curiously, the *Oti-mom-5* putative null allele, *sy465*, is not embryonic lethal in *O.*  
319 *tipulae*, while it is lethal in *C. elegans* (embryonic mesoderm versus endoderm specification;  
320 Rocheleau et al. 1997).

321 ii) a Wnt processing protein, *Oti-mig-14* (homolog of *Drosophila* Wntless) (Bänziger et  
322 al. 2006; Yang et al. 2008). The *mf34* allele is an amino-acid substitution and likely a  
323 hypomorph that may negatively affect the activity of all Wnts.

324 We had distinguished somewhat arbitrarily classes of vulva mutations that affect  
325 competence and centering (*cov* mutants) from those that affect division of vulval precursor  
326 cells (*dov* mutants) (Dichtel et al. 2001). Among the latter class, we found that the *dov-4* locus  
327 encodes a Wnt-type ligand, *Oti-egl-20* (supported by two alleles, including a premature stop).  
328 The *Oti-egl-20* mutation results in a lower competence and division frequency of P4.p and  
329 P8.p, but hardly affects P(5-7).p. Centering of the 1° fate on P5.p only occurs at low  
330 penetrance. Overall, the *Oti-egl-20* phenotype is similar to that of *Oti-mig-14* or *Oti-mom-5*,  
331 albeit much weaker, suggesting the involvement of other Wnt family ligands.

332 The *O. tipulae* genome encodes five genes coding for Wnt signaling molecules, which  
333 we found to be 1:1 orthologs to the five Wnt genes in *C. elegans* (Fig. S4). By smFISH, the  
334 expression pattern of each of these five genes was found to be quite similar in L1-L3 larvae  
335 to that of each ortholog in *C. elegans*, as determined in Song et al. (2010) and Harterink et al.  
336 (2011). Specifically, *Oti-egl-20* is expressed in the posterior region of the animal from the L1  
337 stage (Fig. 3D). *Oti-cwn-1* is also expressed quite posteriorly (Fig. S3A). *Oti-cwn-2* is  
338 expressed in the anterior region (Fig. S3B). *Oti-mom-2* is expressed in the anchor cell from  
339 the L3 stage (Fig. 3D). *Oti-lin-44* is expressed in the tail region and, in the L3 stage, in P6.p  
340 daughters (Fig. 3, Fig. S6). Similar to *cwn-1* in *C. elegans* (Harterink et al. 2011; Minor et al.  
341 2013), we found that *Oti-lin-44* is in addition expressed in the sex myoblast precursors that  
342 are located left and right of the anchor cell in the L3 stage (Fig. S6). As the sex myoblast  
343 expression of *Oti-lin-44* differed from the reported uterus/anchor cell pattern in *C. elegans*  
344 using lacZ staining or fluorescent reporters (Inoue et al. 2004), we localized *lin-44* by smFISH  
345 in *C. elegans* and saw a similar expression in the sex myoblasts (identified by labeling with  
346 *hlh-8::GFP*; Harfe et al. 1998) and P6.px, and none in the uterus and anchor cell (Fig. S7). In  
347 conclusion, the larval expression patterns of the five Wnt genes were thus similar in *O. tipulae*  
348 and *C. elegans*.

349 From the *Oti-egl-20* expression pattern and mutant phenotype, the EGL-20 protein is  
350 produced from the posterior of the animal and promotes Pn.p cell competence as far as P4.p.  
351 P3.p is not competent and does not divide in *O. tipulae* (Félix and Sternberg 1997; Delattre  
352 and Félix 2001) and is thus not affected by Wnt pathway mutations, whereas it is highly

353 sensitive to Wnt pathway modulation in *C. elegans* (Pénigault and Félix 2011b). However, the  
354 difference in phenotype severity between *Oti-mig-14* or *Oti-mom-5* mutants on one hand and  
355 *Oti-egl-20* (including the *sy464* allele with a stop codon) on the other hand, suggests that other  
356 Wnt signals, perhaps mostly CWN-1 from the posterior as in *C. elegans* (Gleason et al. 2006),  
357 may act jointly to promote Pn.p competence.

358 Overall, the major differences between *C. elegans* and *O. tipulae* for this class of  
359 mutants are 1) Wnt pathway mutations were not found in the first vulva mutant screens in *C.*  
360 *elegans*; 2) the miscentering of the 1° fate on P5.p is much more penetrant in *O. tipulae* than  
361 in *C. elegans* (Fig. 3, see Discussion). 3) Wnt pathway mutations lead to low division frequency  
362 of P8.p in *O. tipulae* compared to *C. elegans*, for a comparable or even weaker effect on P4.p:  
363 *Oti-egl-20(sy464)* and *Cel-egl-20(n585)* animals show 30% and 1% loss of division of P8.p,  
364 respectively (Dichtel et al. 2001; Myers and Greenwald 2007).

365

### 366 **The hyperinduced mutations affect plexin and semaphorin genes**

367 Much more unexpected is the identification of the mutations resulting in a vulva hyperinduction  
368 phenotype. Indeed, the *iov-3* locus turned out to correspond to the *Oti-plx-1* gene, coding for  
369 a plexin (one small deletion and two missense alleles), while the *iov-2* mutant shows a deletion  
370 in the *Oti-smp-1* gene, coding for a semaphorin-type ligand (Fig. 4A). This implicates a new  
371 intercellular signaling pathway in vulval cell fate patterning and induction.

372 The plexin-semaphorin pathway is well known for contact-dependent growth inhibition  
373 between neurons, acting in many organisms (Kolodkin et al. 1992; Luo et al. 1993; Winberg  
374 et al. 1998). In *C. elegans*, mutations in *smp-2/mab-20*, *smp-1* and *plx-1* (Roy et al. 2000;  
375 Ginzburg et al. 2002; Fujii et al. 2002; Dalpé et al. 2004; Pickett et al. 2007; Nukazuka et al.  
376 2008) were found and mostly studied for their effect on the displacement of sensory organs  
377 (rays) in the male tail. Their impact on vulva formation mostly concerns late morphogenesis  
378 events that take place after the three rounds of Pn.p divisions (Liu et al. 2005; Dalpé et al.  
379 2005; Pellegrino et al. 2011), while their effect on vulval induction is minor (Liu et al. 2005), as  
380 also shown in Fig. 4B and Table S4.

381 The hyperinduction of P4.p and P8.p in the *O. tipulae iov-2/smp-1* and *iov-3/plx-1*  
382 mutants is a transformation of 3° to 2° fate. The ectopically induced cells never adopt a 1° fate;  
383 they join the main vulval invagination and therefore the adult phenotype is a protruding vulva  
384 and not additional bumps on the cuticle as in the *C. elegans* Multivulva mutants. This contrast  
385 with the *C. elegans* hyperinduced mutants, which correspond to an excess of Ras pathway  
386 signaling, leading to ectopic 1° and 2° fates.

387 To understand why plexin and semaphorin mutations cause a vulval hyperinduction in  
388 *O. tipulae*, we measured cell position at the time of induction, before the formation of the vulval  
389 invagination. As in *C. elegans* plexin and semaphorin mutants, we observed that the vulva

390 precursor cells do not form an antero-posterior row as in wild-type animals (Liu et al. 2005;  
391 Dalpé et al. 2005) but instead either overlap left and right of each other or sometimes show a  
392 lack of junction and a gap between successive cells (Fig. 4B,C,D and E). In contrast to *C.*  
393 *elegans*, gaps are rare in *O. tipulae* mutants and do not concern the three central cells.  
394 Instead, left-right overlaps occur between P4.p and P5.p, and between P7.p and P8.p. As  
395 these overlaps could alter the distance between the anchor cell and the Pn.p cells, we  
396 measured these distances and found that they were shorter in the *O. tipulae plx-1(mf78)*  
397 mutant but not in the *C. elegans* counterpart *plx-1(ev724)* (Fig. 4C, D). (Both alleles are  
398 deletion alleles, and thus putatively comparable null alleles.) As a consequence, the vulva  
399 precursor cells tend to be closer to the anchor cell in *O. tipulae*, likely explaining the excess  
400 of 2° fate induction in the first induction wave.

401 In summary, the identification of these four different mutations points to  
402 plexin/semaphorin signalling as an important pathway for the correct induction of the vulva  
403 precursor cells, due to its effect on vulval precursor cell positioning.

## 404 Discussion

405

### 406 The unsurprising single Vulvaless mutation in *O. tipulae*

407 In the first *C. elegans* screens for vulval induction defects, most Vulvaless mutations  
408 corresponding to induction defects affected the genes *lin-2*, *lin-7* or *lin-10* (Horvitz and Sulston  
409 1980; Ferguson and Horvitz 1985; Ferguson et al. 1987). Only rare tissue-specific reduction-  
410 of-function alleles were recovered in *lin-3* and *let-23*, coding for the EGF and the EGF receptor,  
411 respectively. Downstream factors in the EGFR-Ras/MAP kinase cascade were only  
412 subsequently obtained by suppressor or enhancer screens (Sternberg and Han 1998).

413 For *lin-3*, the first *C. elegans* allele, *e1417*, turned out to be a base substitution affecting  
414 a *cis*-regulatory E-box (Hwang and Sternberg 2004). The second viable allele, *n378*, is a  
415 substitution in the signal peptide, showing high tissue-specificity for reasons still ignored (Liu  
416 et al. 1999). Further *lin-3* alleles were obtained in non-complementation screens or screens  
417 for lethal mutants (Ferguson and Horvitz 1985; Liu et al. 1999). In summary, besides the *lin*-  
418 *2/lin-7/lin-10* genes, a main target for a Vulvaless mutation appeared to be the *cis*-regulatory  
419 element that activates *lin-3* expression in the anchor cell in a tissue-specific manner. Given  
420 this, the sole Vulvaless mutation we found in mutagenesis of *O. tipulae*, *iov-1(mf86)*, is a  
421 remarkably predictable hit: a deletion in a homologous non-coding region to that mutated in  
422 *Cel-lin-3(e1417)* (Barkoulas et al. 2016). Random mutagenesis ended up being as targeted  
423 as the CRISPR/Cas9 experiment that confirmed the importance of this E-box (Fig. 2).

424 Concerning *lin-2*, *lin-7* or *lin-10*, we now know that the proteins LIN-2/CASK, LIN-  
425 7/Velis and LIN-1/Mint1 bind to the C-terminus of the LET-23/EGFR receptor and help to  
426 localize it to the basolateral membrane facing the anchor cell (Simske et al. 1996; Kaech et  
427 al. 1998). Mutations in any of these three loci were so far not recovered in *C. briggsae* and *P.*  
428 *pacificus* nor here in *O. tipulae* (Fig. 5). It is thus likely that either their loss of function is lethal  
429 or it does not affect the vulva. It will be interesting to delete them using reverse genetic  
430 methods such as CRISPR/Cas9 mediated genome modification.

431

### 432 A surprise signaling pathway found only in *O. tipulae* vulva mutant screens

433 In stark contrast, the identification of the semaphorin-plexin pathway using the hyperinduced  
434 mutations in *O. tipulae* was unpredictable and is a novel result. This genetic screen outcome  
435 could not have been foreseen from results in *C. elegans*, *C. briggsae* (Seetharaman et al.  
436 2010; Sharanya et al. 2015; Sharanya et al. 2012) nor *P. pacificus* (Jungblut and Sommer  
437 1998; Jungblut and Sommer 2001; Schlager et al. 2006; Tian et al. 2008). In the case of *C.*  
438 *elegans*, the vulval fate specification errors in plexin/semaphorin mutants are indeed rare and  
439 occur at low penetrance and in directions of both excess and loss of induction. Instead in *O.*  
440 *tipulae*, the specification of P4.p or P8.p as a 2° fate is quite penetrant and we only observe



441 hyperinduction (Table S4, Fig. 4B). The cell positioning defects in the *O. tipulae*  
442 plexin/semaphorin mutants explain that the hyperinduction of vulval fates is gonad-dependent  
443 (Dichtel-Danjoy and Félix 2004b). In contrast, in *C. elegans* hyperinduced mutants, such as  
444 *lin-1*, *lin-13*, *lin-15*, *lin-31* and *lin-34(d)*, retain some vulval induction upon anchor-cell ablation  
445 (or in *lin-3* double mutants) (Ferguson et al. 1987; Han and Sternberg 1990).

446 What explains the difference between *C. elegans* and *O. tipulae* in the effect of  
447 mutations in the plexin-semaphorin pathway? In both species, semaphorin and plexin appear  
448 to act in contact inhibition of the VPCs while they grow and contact each other (Liu et al. 2005)  
449 (Fig. 4). We propose that two not mutually exclusive phenomena concur to the fate  
450 specification difference. First, the VPCs are in average closer to the anchor cell in the early  
451 L3 stage in *Oti-plx-1* mutants compared to the corresponding *C. elegans plx-1* mutants (Fig.  
452 4C,D); this likely increases the exposure of P4.p and P8.p to Oti-LIN-3 from the anchor cell,  
453 hence the 2° fate. The smaller body size of *O. tipulae* may also play a role. Second, the 2°  
454 fate is in part induced in *C. elegans* by direct contact between P6.p and other VPCs through  
455 transmembrane Delta ligands. In *O. tipulae*, due to the difference in fate patterning  
456 mechanism, we have no evidence of lateral signaling, whereby the 1°-fated cell induces the  
457 2° fate in its neighbors, nor of Notch pathway involvement, except maybe later through *Oti-*  
458 *delta* expression in P6.p daughters; indeed, P5.p, P6.p and P7.p do not appear different from  
459 each other before their division – although this may be due to the lack of adequate markers  
460 (Félix and Sternberg 1997). Signaling from the anchor cell at a distance is thus potentially  
461 stronger in *O. tipulae* than in *C. elegans*.

462 In *C. elegans*, vulva precursor cells are attracted towards the anchor cell in response  
463 to LIN-3 signaling, thus creating a positive feedback whereby the most induced cell moves  
464 closest to the anchor cell (Grimbert et al. 2016). The same feedback may be at stake for the  
465 2° cells, but curiously, we never observed an excess of 1°-fated cells in *O. tipulae*. This  
466 correlates with the fact that we do not observe other VPCs overlapping with P6.p nor  
467 contacting the anchor cell in the plexin/semaphorin mutants. It is thus possible that a lateral  
468 inhibition from P6.p to its neighbors takes place in these mutants, preventing the positioning  
469 of two VPCs below the anchor cell.

470

#### 471 **Wnt and EGF pathways act jointly in vulval competence and induction**

472 We find that *O. tipulae* Wnt pathway mutants affect Pn.p competence and induction (2° to 3°  
473 and 3° to F transformations, Fig. 3A) and result in centering of the 1° fate on P5.p. The initial  
474 genetic screens for *C. elegans* vulva mutants did not identify the Wnt pathway. The  
475 corresponding mutants were found later by specifically screening for mutants that had a  
476 variably expressed protruding vulva phenotype (Eisenmann et al. 1998; Eisenmann and Kim  
477 2000). It would be tempting to conclude at a difference in Wnt pathway involvement in *O.*



478 *tipulae* compared to *C. elegans* vulva induction. However, we propose that the difference is  
479 subtle.

480 In *C. elegans*, the Wnt pathway is mostly known to maintain vulval precursor  
481 competence to receive the LIN-3 signal in the L2 and L3 stage (Eisenmann et al. 1998). In the  
482 absence of Wnts, the Pn.p cells adopt a F fate (Fusion with hyp7 in the L2 stage) instead of  
483 the 3° fate (one division in the L3 stage before fusion to hyp7) (Gleason et al. 2006). This  
484 prevents them from being induced to a vulval fate. In other words, the Wnt signaling pathway  
485 establishes competence (F to 3° fate transformation) for the next round of signaling (EGF,  
486 which induces 1° and 2° fates). Yet the two inductions by Wnt and EGF in *C. elegans* are  
487 partially intermingled. Indeed, the Wnt pathway also participates to the induction of 2° vulval  
488 fates versus the 3° fate (Eisenmann et al. 1998; Gleason et al. 2002; Seetharaman et al. 2010;  
489 Milloz et al. 2008; Braendle and Félix 2008). Conversely, the LIN-3/EGF pathway participates  
490 to the "competence maintenance" (F versus 3°) (Myers and Greenwald 2007). Thus, both  
491 pathways appear to jointly act in *C. elegans* to promote both "competence" (a very first  
492 induction) and 2° vulval fate induction.

493 The same holds true in *O. tipulae*, with quantitative variations in mutant phenotypes.  
494 In the *Oti-lin-3(mf86)* mutant, the 1° fate is abolished while the 2° fate is reduced. The  
495 intermediate level of 2° fate may be due to some remaining *Oti-lin-3* gene expression (Fig.  
496 2C). Alternatively, another signal, such as Wnts, may participate to 2° fate induction.  
497 Accordingly, a double mutant between EGF and Wnt pathways, *Oti-mom-5(sy493); lin-*  
498 *3(mf86)*, abolishes induction, as in *C. elegans* (Eisenmann et al. 1998; Braendle and Félix  
499 2008) (Fig. 3A). We thus conclude that despite quantitative differences in mutant penetrance,  
500 the joint involvement of the Wnt and EGF pathways in the induction of vulval fates appears  
501 similar in *C. elegans* and *O. tipulae*.

502 This joint induction by Wnts and LIN-3 differs from the situation described in an  
503 outgroup nematode, *Pristionchus pacificus* (Kiontke et al. 2007). In this species, the induction  
504 of vulval fates occurs gradually before and after Pn.p divisions (2° then 1°), as in *O. tipulae*  
505 and unlike *C. elegans* (Sigrist and Sommer 1999; Kiontke et al. 2007). There is no equivalent  
506 to the 3° fate in *P. pacificus*. Indeed, on the anterior side non-competent cells die by apoptosis.  
507 On the posterior side, P8.p is competent early on to replace P(5-7).p then fuses to hyp7  
508 without division – only after the onset of vulval induction, which occurs earlier than in *C.*  
509 *elegans* compared to larval molts (Sommer 1997; Sigrist and Sommer 1999; Jungblut and  
510 Sommer 2000). Only two  $\beta$ -catenins were found in *P. pacificus* (Tian et al. 2008) (there are  
511 no *wrm-1* or *sys-1* orthologs). The *Ppa-bar-1/armadillo(0)* mutant obtained by a targeted  
512 reverse genetic approach is maternal-effect lethal (unlike in *C. elegans*) and strongly affects  
513 the level of induction (Tian et al. 2008). As in *C. elegans*, the multiple Wnt-ligands and  
514 receptors are partially redundant (Gleason et al. 2006; Tian et al. 2008). The Ppa-LIN-44

515 protein is said from alkaline phosphatase reaction to be expressed in the uterus (Tian et al.  
516 2008). It may be good to clarify whether this expression may be in the sex myoblasts on either  
517 side of the uterus, as observed in *O. tipulae* and *C. elegans* (Fig. 3, S6). This is important, as  
518 Ppa-LIN-44 cannot represent the vulva induction signal as proposed if it is not expressed in  
519 the gonad precursors ablated in Sigrist and Sommer (1999). Indeed, the only other Wnt  
520 expressed in the *P. pacificus* gonad is *Ppa-mom-2*, but its expression in the anchor cell  
521 appears to start much after the induction of 2° fates begins (Sigrist and Sommer 1999; Kiontke  
522 et al. 2007; Tian et al. 2008).

523

### 524 **The Wnt pathway is required for correct centering of the vulval pattern**

525 The clearest difference of Wnt pathway phenotypes between *C. elegans* and *O. tipulae* lies in  
526 the centering of the 1° fate on P5.p, and the likely correlated higher penetrance of the F fate  
527 in P7.p. In *C. elegans*, only a small percentage of Wnt pathway mutant animals displays P5.p  
528 centering, which was shown to reflect the posterior displacement of P6.p compared to the  
529 anchor cell, and a higher variance in cell positions (Milloz et al. 2008; Grimbert et al. 2016). In  
530 *Oti-mom-5* animals, a strong shift in anchor cell position relative to P6.p and P5.p in the L2  
531 stage was also observed (Louvet-Vallée et al. 2003). Quantitative differences between the  
532 various phenotypes in the two species likely correspond to the extent of cell displacement.

533

### 534 **Conclusions**

535 We present in Fig. 5 our current model of the vulval cell fate patterning mechanism in *O.*  
536 *tipulae*. Oti-LIN-3 produced by the anchor cell is important for induction of 1° and 2° fates. Oti-  
537 LIN-3 is thus likely the inductive signal for both steps of induction as defined in Félix and  
538 Sternberg (1997). The 1° fate induction appears to always occur upon contact with the anchor  
539 cell, which may represent the requirement for a transmembrane ligand or simply high  
540 concentration of the ligand.

541 The Wnt pathway is required for the F to 3° induction and also for the 3° to 2° induction  
542 (directly or indirectly), as in *C. elegans*. Wnts also prevent centering of the vulva pattern on  
543 P6.p, probably by a repulsive action of the posterior Wnts (Fig. 6). The latter is much more  
544 evident in *O. tipulae* than in *C. elegans* (Grimbert et al. 2016).

545 Our findings on the effects of both Wnt and semaphorin pathways on VPC positioning  
546 relative to the anchor cell emphasize the importance of cell positioning in vulval cell fate  
547 patterning since gradients of signaling molecules (EGF, Wnt) are involved. We note that the  
548 Wnt pathway mutants and *Oti-mig-13* have similar vulva phenotypes, as is true for their effect  
549 on Q<sub>R</sub> neuroblast migration (Sym et al. 1999; Wang et al. 2013). The VPC positioning defect  
550 may link these regulatory pathways to cell polarity, growth and movement, and to the actin  
551 cytoskeleton (Wang et al. 2013; Grimbert et al. 2016).

552

553

### 554 **Acknowledgements**

555 We thank Aurélien Richaud for performing a smFISH experiment, Joao Picao Osorio for  
556 comments on the manuscript, Michalis Barkoulas for his advice on the *Oscheius* smFISH,  
557 Mark Blaxter's lab for their continuous support of nematode genomics as well as for  
558 maintaining the *Caenorhabditis* website (<http://www.caenorhabditis.org/>), Benjamin  
559 Podbilewicz for advice on the immunofluorescence experiments, and Sana Dieudonné,  
560 Aurélien Richaud and Clément Dubois for advice and help in the use of the mapping by  
561 sequencing technique. Some strains were provided by the CGC, which is funded by NIH Office  
562 of Research Infrastructure Programs (P40 OD010440). We thank Wormbase.

563

### 564 **Funding**

565 This work was funded by grants from the Agence Nationale de la Recherche (ANR12-BSV2-  
566 0004-01 and ANR10-LABX-54 MEMOLIFE). We also acknowledge the support of the  
567 Bettencourt Schueller Foundation (Coup d'Élan 2011) and the support of the Human Frontier  
568 Science Program (RGP030/2016).

569

### 570 **Author contributions**

571 MAF, FB and AMVV designed the experiments. MAF and FB performed crosses, isolated  
572 DNA and analyzed the sequences, with input from AMVV. FB, MAF and AMVV identified *O.*  
573 *tipulae* gene homologs. AMVV performed the smFISH, CRISPR and DIC analyses. AMVV  
574 and MAF wrote the manuscript, with input from FB.

## 575 **References**

576

577 Bänziger, C., Soldini, D., et al. (2006). Wntless, a conserved membrane protein dedicated to  
578 the secretion of Wnt proteins from signaling cells. *Cell* **125**: 509-22.

579 Barkoulas, M., van Zon, J. S., Milloz, J., van Oudenaarden, A., Félix, M. A. (2013). Robustness  
580 and epistasis in the *C. elegans* vulval signaling network revealed by pathway dosage  
581 modulation. *Dev Cell* **24**: 64-75.

582 Barkoulas, M., Vargas Velazquez, A. M., Peluffo, A. E., Félix, M. A. (2016). Evolution of new  
583 *cis*-regulatory motifs required for cell-specific gene expression in *Caenorhabditis*. *PLoS*  
584 *Genet* **12**: e1006278.

585 Besnard, F., Koutsovoulos, G., Dieudonné, S., Blaxter, M., Félix, M.-A. (2017). Toward  
586 universal forward genetics: Using a draft genome sequence of the nematode *Oscheius*  
587 *tipulae* to identify mutations affecting vulva development. *Genetics* **206**: 1747-1761.

588 Braendle, C., Félix, M.-A. (2008). Plasticity and errors of a robust developmental system in  
589 different environments. *Dev Cell* **15**: 714-724.

590 Brenner, S. (1974). The genetics of *Caenorhabditis elegans*. *Genetics* **77**: 71-94.

591 Cingolani, P., Platts, A., et al. (2012). A program for annotating and predicting the effects of  
592 single nucleotide polymorphisms, SnpEff: SNPs in the genome of *Drosophila*  
593 *melanogaster* strain w1118; iso-2; iso-3. *Fly (Austin)* **6**: 80-92.

594 Dalpé, G., Brown, L., Culotti, J. G. (2005). Vulva morphogenesis involves attraction of plexin  
595 1-expressing primordial vulva cells to semaphorin 1a sequentially expressed at the  
596 vulva midline. *Development* **132**: 1387-400.

597 Dalpé, G., Zhang, L. W., Zheng, H., Culotti, J. G. (2004). Conversion of cell movement  
598 responses to Semaphorin-1 and Plexin-1 from attraction to repulsion by lowered levels  
599 of specific RAC GTPases in *C. elegans*. *Development* **131**: 2073-88.

600 Delattre, M., Félix, M.-A. (2001). Polymorphism and evolution of vulval precursor cell lineages  
601 within two nematode genera, *Caenorhabditis* and *Oscheius*. *Curr Biol* **11**: 631-643.

602 Dichtel, M.-L., Louvet-Vallée, S., Viney, M. E., Félix, M.-A., Sternberg, P. W. (2001). Control  
603 of vulval cell division number in the nematode *Oscheius/Dolichorhabditis* sp. CEW1.  
604 *Genetics* **157**: 183-197.

605 Dichtel-Danjou, M.-L., Félix, M.-A. (2004a). Phenotypic neighborhood and micro-evolvability.  
606 *TIG* **20**: 268-276.

607 Dichtel-Danjou, M.-L., Félix, M.-A. (2004b). The two steps of vulval induction in *Oscheius*  
608 *tipulae* CEW1 recruit common regulators including a MEK kinase. *Dev. Biol.* **265**: 113-  
609 126.

- 610 Eisenmann, D. M., Kim, S. K. (2000). Protruding vulva mutants identify novel loci and Wnt  
611 signaling factors that function during *Caenorhabditis elegans* development. *Genetics*  
612 **156**: 1097-1116.
- 613 Eisenmann, D. M., Maloof, J. N., Simske, J. S., Kenyon, C., Kim, S. K. (1998). The  $\beta$ -catenin  
614 homolog BAR-1 and LET-60 Ras coordinately regulate the Hox gene *lin-39* during  
615 *Caenorhabditis elegans* vulval development. *Development* **125**: 3667-3680.
- 616 Félix, M.-A. (2007). Cryptic quantitative evolution of the vulva intercellular signaling network in  
617 *Caenorhabditis*. *Curr. Biol.* **17**: 103-114.
- 618 Félix, M.-A. (2012). *Caenorhabditis elegans* vulval cell fate patterning. *Phys Biol.* **9**: 045001.
- 619 Félix, M.-A., Barkoulas, M. (2012). Robustness and flexibility in nematode vulva development.  
620 *TIG* **28**: 185-195.
- 621 Félix, M.-A., De Ley, P., et al. (2000a). Evolution of vulva development in the Cephalobina  
622 (Nematoda). *Dev. Biol.* **221**: 68-86.
- 623 Félix, M.-A., Delattre, M., Dichtel, M.-L. (2000b). Comparative developmental studies using  
624 *Oscheius/Dolichorhabditis* sp. CEW1 (Rhabditidae). *Nematology* **2**: 89-98.
- 625 Félix, M.-A., Sternberg, P. W. (1997). Two nested gonadal inductions of the vulva in  
626 nematodes. *Development* **124**: 253-259.
- 627 Félix, M.-A., Sternberg, P. W. (1998). A gonad-derived survival signal for vulva precursor cells  
628 in two nematode species. *Curr. Biol.* **8**: 287-290.
- 629 Félix, M. A., Duvéau, F. (2012). Population dynamics and habitat sharing of natural populations  
630 of *Caenorhabditis elegans* and *C. briggsae*. *BMC Biol* **10**: 59.
- 631 Ferguson, E., Horvitz, H. R. (1985). Identification and characterization of 22 genes that affect  
632 the vulval cell lineages of *Caenorhabditis elegans*. *Genetics* **110**: 17-72.
- 633 Ferguson, E. L., Sternberg, P. W., Horvitz, H. R. (1987). A genetic pathway for the specification  
634 of the vulval cell lineages of *Caenorhabditis elegans*. *Nature* **326**: 259-267.
- 635 Francis, R., Waterston, R. H. (1991). Muscle cell attachment in *Caenorhabditis elegans*. *J. Cell*  
636 *Biol.* **114**: 465-479.
- 637 Fujii, T., Nakao, F., et al. (2002). *Caenorhabditis elegans* PlexinA, PLX-1, interacts with  
638 transmembrane semaphorins and regulates epidermal morphogenesis. *Development*  
639 **129**: 2053-63.
- 640 Ginzburg, V. E., Roy, P. J., Culotti, J. G. (2002). Semaphorin 1a and semaphorin 1b are  
641 required for correct epidermal cell positioning and adhesion during morphogenesis in  
642 *C. elegans*. *Development* **129**: 2065-78.
- 643 Gish, W., States, D. J. (1993). Identification of protein coding regions by database similarity  
644 search. *Nat Genet* **3**: 266-72.

- 645 Gleason, J. E., Korswagen, H. C., Eisenmann, D. M. (2002). Activation of Wnt signaling  
646 bypasses the requirement for RTK/Ras signaling during *C. elegans* vulval induction.  
647 *Genes Dev.* **16**: 1281-1290.
- 648 Gleason, J. E., Szyleyko, E. A., Eisenmann, D. M. (2006). Multiple redundant Wnt signaling  
649 components function in two processes during *C. elegans* vulval development. *Dev.*  
650 *Biol.* **298**: 442-457.
- 651 Greenwald, I. S., Sternberg, P. W., Horvitz, H. R. (1983). The *lin-12* locus specifies cell fates  
652 in *Caenorhabditis elegans*. *Cell* **34**: 435-444.
- 653 Grimbert, S., Tietze, K., et al. (2016). Anchor cell signaling and vulval precursor cell positioning  
654 establish a reproducible spatial context during *C. elegans* vulval induction. *Dev Biol*  
655 **416**: 123-135.
- 656 Han, M., Sternberg, P. W. (1990). *let-60*, a gene that specifies cell fates during *C. elegans*  
657 vulval induction, encodes a ras protein. *Cell* **63**: 921-931.
- 658 Harfe, B. D., Vaz Gomes, A., et al. (1998). Analysis of a *Caenorhabditis elegans* Twist homolog  
659 identifies conserved and divergent aspects of mesodermal patterning. *Genes Dev* **12**:  
660 2623-35.
- 661 Harterink, M., Kim, D. H., et al. (2011). Neuroblast migration along the anteroposterior axis of  
662 *C. elegans* is controlled by opposing gradients of Wnts and a secreted Frizzled-related  
663 protein. *Development* **138**: 2915-24.
- 664 Horvitz, H. R., Sulston, J. E. (1980). Isolation and genetic characterization of cell-lineage  
665 mutants of the nematode *Caenorhabditis elegans*. *Genetics* **96**: 435-454.
- 666 Hwang, B. J., Sternberg, P. W. (2004). A cell-specific enhancer that specifies *lin-3* expression  
667 in the *C. elegans* anchor cell for vulval development. *Development* **131**: 143-151.
- 668 Inoue, T., Oz, H. S., et al. (2004). *C. elegans* LIN-18 is a Ryk ortholog and functions in parallel  
669 to LIN-17/Frizzled in Wnt signaling. *Cell* **118**: 795-806.
- 670 Ji, J., van Oudenaarden, A. (2012) Single molecule fluorescent in situ hybridization (smFISH)  
671 of *C. elegans* worms and embryos. WormBook DOI: doi/10.1895/wormbook.1.153.1.
- 672 Jungblut, B., Sommer, R. J. (1998). The *Pristionchus pacificus* *mab-5* gene is involved in the  
673 regulation of ventral epidermal cell fates. *Curr. Biol.* **8**: 775-778.
- 674 Jungblut, B., Sommer, R. J. (2000). Novel cell-cell interactions during vulva development in  
675 *Pristionchus pacificus*. *Development* **127**: 3295-3303.
- 676 Jungblut, B., Sommer, R. J. (2001). The nematode *even-skipped* homolog *vab-7* regulates  
677 gonad and vulva position in *Pristionchus pacificus*. *Development* **128**: 253-261.
- 678 Kaech, S. M., Whitfield, C. W., Kim, S. K. (1998). The LIN-2/LIN-7/LIN-10 complex mediates  
679 basolateral membrane localization of the *C. elegans* EGF receptor LET-23 in vulval  
680 epithelial cells. *Cell* **94**: 761-771.



- 681 Kimble, J. (1981). Alterations in cell lineage following laser ablation of cells in the somatic  
682 gonad of *Caenorhabditis elegans*. *Dev. Biol.* **87**: 286-300.
- 683 Kiontke, K., Barrière, A., et al. (2007). Trends, stasis and drift in the evolution of nematode  
684 vulva development. *Curr. Biol.* **17**: 1925-1937.
- 685 Kolodkin, A. L., Matthes, D. J., et al. (1992). Fasciclin IV: sequence, expression, and function  
686 during growth cone guidance in the grasshopper embryo. *Neuron* **9**: 831-45.
- 687 Kolotuev, I., Podbilewicz, B. (2004). *Pristionchus pacificus* vulva formation: polarized division,  
688 cell migration, cell fusion, and evolution of invagination. *Dev Biol* **266**: 322-33.
- 689 Kolotuev, I., Podbilewicz, B. (2008). Changing of the cell division axes drives vulva evolution  
690 in nematodes. *Dev. Biol.* **313**: 142-154.
- 691 Li, H., Durbin, R. (2009). Fast and accurate short read alignment with Burrows-Wheeler  
692 transform. *Bioinformatics* **25**: 1754-60.
- 693 Li, H., Handsaker, B., et al. (2009). The Sequence Alignment/Map format and SAMtools.  
694 *Bioinformatics* **25**: 2078-9.
- 695 Liu, J., Tzou, P., Hill, R. J., Sternberg, P. W. (1999). Structural requirements for the tissue-  
696 specific and tissue-general functions of the *C. elegans* epidermal growth factor LIN-3.  
697 *Genetics* **153**: 1257-1269.
- 698 Liu, Z., Fujii, T., et al. (2005). *C. elegans* PlexinA PLX-1 mediates a cell contact-dependent  
699 stop signal in vulval precursor cells. *Dev Biol* **282**: 138-51.
- 700 Louvet-Vallée, S., Kolotuev, I., Podbilewicz, B., Félix, M.-A. (2003). Control of vulval  
701 competence and centering in the nematode *Oscheius* sp. 1 CEW1. *Genetics* **163**: 133-  
702 146.
- 703 Luo, Y., Raible, D., Raper, J. A. (1993). Collapsin: a protein in brain that induces the collapse  
704 and paralysis of neuronal growth cones. *Cell* **75**: 217-27.
- 705 Milloz, J., Dureau, F., Nuez, I., Félix, M.-A. (2008). Intraspecific evolution of the intercellular  
706 signaling network underlying a robust developmental system. *Genes Dev.* **22**: 3064-  
707 3075.
- 708 Milne, I., Stephen, G., et al. (2013). Using Tablet for visual exploration of second-generation  
709 sequencing data. *Brief Bioinform* **14**: 193-202.
- 710 Minor, P. J., He, T. F., Sohn, C. H., Asthagiri, A. R., Sternberg, P. W. (2013). FGF signaling  
711 regulates Wnt ligand expression to control vulval cell lineage polarity in *C. elegans*.  
712 *Development* **140**: 3882-91.
- 713 Myers, T. R., Greenwald, I. (2007). Wnt signal from multiple tissues and *lin-3*/EGF signal from  
714 the gonad maintain vulval precursor cell competence in *Caenorhabditis elegans*. *Proc.*  
715 *Natl. Acad. Sci. USA* **104**: 20368-20373.



- 716 Nukazuka, A., Fujisawa, H., Inada, T., Oda, Y., Takagi, S. (2008). Semaphorin controls  
717 epidermal morphogenesis by stimulating mRNA translation via eIF2alpha in  
718 *Caenorhabditis elegans*. *Genes Dev* **22**: 1025-36.
- 719 Paix, A., Folkmann, A., Rasoloson, D., Seydoux, G. (2015). High efficiency, homology-directed  
720 genome editing in *Caenorhabditis elegans* using CRISPR-Cas9 ribonucleoprotein  
721 complexes. *Genetics* **201**: 47-54.
- 722 Pellegrino, M. W., Farooqui, S., et al. (2011). LIN-39 and the EGFR/RAS/MAPK pathway  
723 regulate *C. elegans* vulval morphogenesis via the VAB-23 zinc finger protein.  
724 *Development* **138**: 4649-60.
- 725 Pénigault, J.-B., Félix, M.-A. (2011a). Evolution of a system sensitive to stochastic noise: P3.p  
726 cell fate in *Caenorhabditis*. *Dev Biol* **357**: 419-427.
- 727 Pénigault, J.-B., Félix, M.-A. (2011b). High sensitivity of *C. elegans* vulval precursor cells to  
728 the dose of posterior Wnts. *Dev Biol* **357**: 428-438.
- 729 Pickett, C. L., Breen, K. T., Ayer, D. E. (2007). A *C. elegans* Myc-like network cooperates with  
730 semaphorin and Wnt signaling pathways to control cell migration. *Dev Biol* **310**: 226-  
731 39.
- 732 Raj, A., van den Bogaard, P., Rifkin, S., van Oudenaarden, A., Tyagi, S. (2008). Imaging  
733 individual mRNA molecules using multiple singly labeled probes. *Nature Methods* **5**:  
734 877-879.
- 735 Rocheleau, C. E., Downs, W. D., et al. (1997). Wnt signaling and an APC-related gene specify  
736 endoderm in early *C. elegans* embryos. *Cell* **90**: 707-716.
- 737 Roy, P. J., Zheng, H., Warren, C. E., Culotti, J. G. (2000). *mab-20* encodes Semaphorin-2a  
738 and is required to prevent ectopic cell contacts during epidermal morphogenesis in  
739 *Caenorhabditis elegans*. *Development* **127**: 755-67.
- 740 Schlager, B., Roseler, W., Zheng, M., Gutierrez, A., Sommer, R. J. (2006). HAIRY-like  
741 transcription factors and the evolution of the nematode vulva equivalence group. *Curr*  
742 *Biol* **16**: 1386-94.
- 743 Seetharaman, A., Cumbo, P., Bojanala, N., Gupta, B. P. (2010). Conserved mechanism of Wnt  
744 signaling function in the specification of vulval precursor fates in *C. elegans* and *C.*  
745 *briggsae*. *Dev Biol* **346**: 128-39.
- 746 Sharanya, D., Fillis, C. J., et al. (2015). Mutations in *Caenorhabditis briggsae* identify new  
747 genes important for limiting the response to EGF signaling during vulval development.  
748 *Evol Dev* **17**: 34-48.
- 749 Sharanya, D., Thillainathan, B., et al. (2012). Genetic control of vulval development in  
750 *Caenorhabditis briggsae*. *G3 (Bethesda)* **2**: 1625-41.
- 751 Sigrist, C. B., Sommer, R. J. (1999). Vulva formation in *Pristionchus pacificus* relies on  
752 continuous gonadal induction. *Dev. Genes Evol.* **209**: 451-459.

- 753 Simske, J. S., Kaech, S. M., Harp, S. A., Kim, S. K. (1996). LET-23 receptor localization by the  
754 cell junction protein LIN-7 during *C. elegans* vulval induction. *Cell* **85**: 195-204.
- 755 Sommer, R. J. (1997). Evolutionary changes of developmental mechanisms in the absence of  
756 cell lineage alterations during vulva formation in the Diplogastridae (Nematoda).  
757 *Development* **124**: 243-251.
- 758 Sommer, R. J. (2005). Evolution of development in nematodes related to *C. elegans*. In  
759 WormBook, The *C. elegans* Research Community, ed., <http://www.wormbook.org>,  
760 doi/10.1895/wormbook.1.46.1
- 761 Sommer, R. J. (2006). *Pristionchus pacificus*. In WormBook, The *C. elegans* Research  
762 Community, ed., <http://www.wormbook.org>, doi/10.1895/wormbook.1.102.1
- 763 Sommer, R. J., Sternberg, P. W. (1994). Changes of induction and competence during the  
764 evolution of vulva development in nematodes. *Science* **265**: 114-118.
- 765 Sommer, R. J., Sternberg, P. W. (1996). Apoptosis and change of competence limit the size  
766 of the vulva equivalence group in *Pristionchus pacificus*: a genetic analysis. *Curr. Biol.*  
767 **6**: 52-59.
- 768 Song, S., Zhang, B., et al. (2010). A Wnt-Frz/Ror-Dsh pathway regulates neurite outgrowth in  
769 *Caenorhabditis elegans*. *PLoS Genet* **6**.
- 770 Sternberg, P.W. (2005). Vulval development. In WormBook, The *C. elegans* Research  
771 Community, ed., <http://www.wormbook.org>, doi/10.1895/wormbook.1.6.1
- 772 Sternberg, P. W., Han, M. (1998). Genetics of RAS signaling in *C. elegans*. *TIG* **14**: 466-472.
- 773 Sternberg, P. W., Horvitz, H. R. (1982). Postembryonic nongonadal cell lineages of the  
774 nematode *Panagrellus redivivus*: Description and comparison with those of  
775 *Caenorhabditis elegans*. *Dev. Biol.* **93**: 181-205.
- 776 Sulston, J., Horvitz, H. R. (1977). Postembryonic cell lineages of the nematode *Caenorhabditis*  
777 *elegans*. *Dev. Biol.* **56**: 110-156.
- 778 Sulston, J. E., White, J. G. (1980). Regulation and cell autonomy during postembryonic  
779 development of *Caenorhabditis elegans*. *Dev. Biol.* **78**: 577-597.
- 780 Sym, M., Robinson, N., Kenyon, C. (1999). MIG-13 positions migrating cells along the  
781 anteroposterior body axis of *C. elegans*. *Cell* **98**: 25-36.
- 782 Tian, H., Schlager, B., Xiao, H., Sommer, R. J. (2008). Wnt signaling induces vulva  
783 development in the nematode *Pristionchus pacificus*. *Curr Biol* **18**: 142-6.
- 784 True, J. R., Haag, E. S. (2001). Developmental system drift and flexibility in evolutionary  
785 trajectories. *Evol. Dev.* **3**: 109-119.
- 786 Tuli, M. A., Daul, A., Schedl, T. (2018). *Caenorhabditis* nomenclature. In WormBook, The *C.*  
787 *elegans* Research Community, ed., <http://www.wormbook.org>,  
788 doi/10.1895/wormbook.1.183.1

- 789 Van der Auwera, G. A., Carneiro, M. O., et al. (2013). From FastQ data to high confidence  
790 variant calls: the Genome Analysis Toolkit best practices pipeline. *Curr Protoc*  
791 *Bioinformatics* **43**: 11 10 1-33.
- 792 Wang, X., Zhou, F., et al. (2013). Transmembrane protein MIG-13 links the Wnt signaling and  
793 Hox genes to the cell polarity in neuronal migration. *Proc Natl Acad Sci U S A* **110**:  
794 11175-80.
- 795 Winberg, M. L., Noordermeer, J. N., et al. (1998). Plexin A is a neuronal semaphorin receptor  
796 that controls axon guidance. *Cell* **95**: 903-16.
- 797 Yang, P. T., Lorenowicz, M. J., et al. (2008). Wnt signaling requires retromer-dependent  
798 recycling of MIG-14/Wntless in Wnt-producing cells. *Dev Cell* **14**: 140-7.
- 799 Ye, K., Schulz, M. H., Long, Q., Apweiler, R., Ning, Z. (2009). Pindel: a pattern growth  
800 approach to detect break points of large deletions and medium sized insertions from  
801 paired-end short reads. *Bioinformatics* **25**: 2865-2871.

802

803 **TABLES**

804 **Table 1. *Oscheius tipulae* vulva loci identified by mapping-by-sequencing approach.**

805

| Locus        | Allele       | Phenotypes                                   | Mutagen | Position*        | Mutation        | Oti gene | Cel homolog               | Type of lesion          | Reported before in          |
|--------------|--------------|----------------------------------------------|---------|------------------|-----------------|----------|---------------------------|-------------------------|-----------------------------|
| <i>cov-4</i> | <i>sy465</i> | Competence loss, P5.p centering              | EMS     | 10:202548        | G/A             | g06014   | <i>mom-5 / frizzled</i>   | Premature stop          | Louvet-Vallée et al. 2003   |
| <i>cov-4</i> | <i>sy493</i> | Competence loss, P5.p centering              | EMS     | 10:201110        | C/T             | g06014   | <i>mom-5 / frizzled</i>   | Splice acceptor         | Louvet-Vallée et al. 2003   |
| <i>cov-5</i> | <i>mf34</i>  | Competence loss, P5.p centering              | EMS     | 3:189504         | T/C             | g01986   | <i>mig-14 / Wntless</i>   | Missense variant        | Louvet-Vallée et al. 2003   |
| <i>dov-4</i> | <i>sy464</i> | P4.p/P8.p do not divide, some P5.p centering | EMS     | 4:882344         | G/A             | g02936   | <i>egl-20 / Wnt</i>       | Premature stop          | Dichtel et al. 2001         |
| <i>dov-4</i> | <i>sy451</i> | P4.p/P8.p do not divide, some P5.p centering | EMS     | 4:882874         | T/C             | g02936   | <i>egl-20 / Wnt</i>       | Missense variant        | Dichtel et al. 2001         |
| <i>iov-1</i> | <i>mf86</i>  | Hypoinduction                                | TMP-UV  | 39:154942-155133 | 191 bp deletion | g12432   | <i>lin-3</i>              | Cis-regulatory deletion | Dichtel-Danjoy & Félix 2004 |
| <i>iov-2</i> | <i>mf76</i>  | Hyperinduction 2°                            | TMP-UV  | 10:74243-74877   | 634 bp deletion | g05993   | <i>smp-1 / semaphorin</i> | Putative null           | Dichtel-Danjoy & Félix 2004 |
| <i>iov-3</i> | <i>sy447</i> | Hyperinduction 2°                            | EMS     | 86:24647         | A/T             | g14741   | <i>plx-1 / plexin</i>     | Missense variant        | Dichtel-Danjoy & Félix 2004 |
| <i>iov-3</i> | <i>mf52</i>  | Hyperinduction 2°                            | EMS     | 86:24066         | A/T             | g14741   | <i>plx-1 / plexin</i>     | Missense variant        | Dichtel-Danjoy & Félix 2004 |
| <i>iov-3</i> | <i>mf78</i>  | Hyperinduction 2°                            | EMS     | 86:27580-27583   | deletion        | g14741   | <i>plx-1 / plexin</i>     | Premature stop          | Dichtel-Danjoy & Félix 2004 |

806 \*The localization corresponds to the genomic position (**scaffold**: base pair). All molecular  
 807 lesions in the table were identified by the mapping-by-sequencing approach, except the  
 808 additional alleles *mf78* and *sy451* that were identified by PCR and Sanger sequencing of the  
 809 gene.

810

811 **Table 2. Quantification of large interspaces (gaps) between VPCs in *C. elegans* and *O.***  
812 ***tipulae* plexin mutants, as determined by MH27 staining.**

813

| Species           | Strain                        | Phenotype                        | # animals |
|-------------------|-------------------------------|----------------------------------|-----------|
| <i>C. elegans</i> | N2                            | WT                               | > 50      |
|                   |                               |                                  |           |
| <i>C. elegans</i> | ST54: <i>plx-1(nc37)</i>      | WT                               | 37        |
|                   |                               | Gap P7.p - P8.p                  | 13        |
|                   |                               | Gap P6.p - P7.p                  | 6         |
|                   |                               | Gaps P4.p - P5.p and P6.p - P7.p | 1         |
| <i>O. tipulae</i> | CEW1                          | WT                               | > 30      |
|                   |                               |                                  |           |
| <i>O. tipulae</i> | JU108: <i>Oti-plx-1(mf78)</i> | WT                               | 35        |
|                   |                               | Gap P4.p - P5.p                  | 2         |
|                   |                               | Gaps P4.p - P5.p and P7.p - P8.p | 1         |

814

815

## Figure legends

### Figure 1. Vulval cell fate patterning in *Caenorhabditis elegans* and *Oscheius tipulae*.

In the third larval stage (L3) of *C. elegans*, a cell from the somatic gonad known as the Anchor Cell (AC) produces an EGF-like inductive signal (LIN-3, green arrows) that activates the Ras pathway in the central vulva precursor cells (VPC). High Ras signaling promotes the 1° fate (blue circle) in P6.p which, in turn, produces Deltas (red arrows) which induce a 2° fate (red circle) and represses the 1° fate in P5.p and P7.p. Both fates prevent the formation of non-specialized epidermis (3° fate, yellow circles). Only VPCs with 1° or 2° fate will give rise to the cells that will form the vulva (bottom). P3.p is not competent to acquire a vulval cell fate (grey) in *O. tipulae*. Unlike in *C. elegans*, the AC of *O. tipulae* has been shown to be required after VPC division to induce the 1° fate in P6.p descendants. While a similar vulval cell fate pattern is conserved between the two nematodes, the cell division patterns of the 2° and 3° fates are different.

### Figure 2. *Cis*-regulatory lesions in *Oti-lin-3*/EGF cause a hypo-induction of 1° and 2° vulval cell fates.

(A) P(4-8) cell fates in the wild-type CEW1 *O. tipulae* reference strain and mutants for *lin-3*/EGF. The pie diagrams represent the percentage of cell fates over individuals. Yellow, red, and blue are for the 3°, 2° and 1° fates, respectively. Grey denotes an undivided cell fused to the hypodermis. The Vulva Index (V.I.) is calculated as the average number of cells acquiring a vulval cell fate in a set of animals. The quantifications of *Oti-lin-3(mf86)* are from (Dichtel-Danjoy and Félix 2004b). (B) Position of the deletions in the TMP-UV and CRISPR alleles. As in *C. elegans*, the *lin-3* gene of *O. tipulae* is predicted to have two alternative ATGs, with the anchor cell *cis*-regulatory element upstream of the second ATG. Note that the seven exons following the second ATG were excluded from the diagram. (C) Distributions of *Oti-lin-3* mRNA number in the anchor cell of wild-type CEW1 and *lin-3 cis*-regulatory mutants, as quantified by smFISH.

### Figure 3. *O. tipulae* mutants in Wnt signaling display defects in competence and centering of the 1° fate on P5.p.

(A) Pie diagrams representing the percentage of P(4-8).p cells acquiring one of the four possible cell fates (blue, red, yellow and grey for the 1°, 2°, 3° or 4° fates, respectively) for animals of different genotypes. The Vulva Index (V.I.) is calculated as the average number of cells acquiring a vulval cell fate in a set of animals. The quantifications in *Oti-mig-14(mf34)* and *Oti-mom-5(sy493)* animals are from (Louvét-Vallée et al. 2003) and that of *Oti-egl-20(sy464)* from (Dichtel

et al. 2001). (B) Position of different mutations on genes encoding Wnt pathway components. A star designates a stop codon. (C) Diagram of Wnt ligand expression profiles in *O. tipulae* at mid L3 stage. smFISH images of *Oti-cwn-1* and *Oti-cwn-2* are found in Fig. S3. D) smFISH images of *Oti-egl-20*, *Oti-lin-44* and *Oti-mom-2* Wnt ligands after P6.p division at the L3 stage. mRNAs are visible as green dots. The animals were also labeled with DAPI (in blue, labeling nuclei) and fluorophore probes for *Oti-lag-2/delta* (in red, labeling the anchor cell, P6.p descendants, and distal tip cells outside the field of view). *Oti-egl-20* is visible only at the posterior part of the animal (green arrows). *Oti-mom-2* mRNAs (green arrow) are found in the anchor cell (white arrow), while *Oti-lin-44* mRNAs (green arrows) appear in P6.p daughters (as well as sex myoblast precursors outside the focal plane). All the images are set to the same scale. The size of the white bar is 10 micrometers. Anterior is to the left in all images, and the ventral side down.

**Figure 4. *O. tipulae* plexin/semaphorin mutants present defects in vulva induction and closer VPC cells.**

(A) Gene models of *Oti-smp-1* and *Oti-plx-1* with their respective mutations in *O. tipulae*. (B) Schematic depiction of the phenotypic effects of plexin/semaphorin mutants in *C. elegans* and *O. tipulae* on the induction and the localization of Pn.p cells. Quantifications can be found in Table S4. Arrows show the most common localization of intercellular space (gaps) between vulva precursor cells. Each vulva precursor cell diagram (circle) is colored according to the frequency of its acquired fate (yellow, red, and blue for the 3°, 2° and 1° fates, respectively, and grey for undivided). Data from Dichtel-Danjoy & Félix 2004. (C) Normalized distances between the AC and the VPCs in *C. elegans* wild type and *plx-1(ev724)* animals at the mid-L3 stage after DU division. Only the distances between the AC and P3.p, and P6.p are significantly larger in *plx-1* mutants compared to wild-type (Wilcoxon rank sum test,  $p < 0.05$ ). (D) Normalized distances between the AC and the VPCs in *O. tipulae* wild type and *Oti-plx-1(mf78)* animals at the mid-L3 stage after DU division. Distances between each of P(4-8).p and the AC, except for P6.p, are all significantly smaller in *Oti-plx-1(mf78)* mutants relative to wild-type (Wilcoxon rank sum test, with  $p$ -values  $< 10^{-5}$ ). (E) Immunostaining of cell junctions with MH27 antibody (in green), with DAPI staining in blue. The central panel shows overlapping VPCs, while the right panel shows a rare instance of a gap (dotted line) in *Oti-plx-1(mf78)* animals. All the images are set to the same scale. The size of the white bar is 10 micrometers. Anterior is to the left in all images, and the ventral side down.

**Figure 5. Expression of signaling molecules and vulval cell fate patterning in *Oscheius tipulae*.**



The VPCs are color-coded according to their fate as in previous figures. Their boundary is color-coded according to the signaling molecules that they express (at least as mRNAs): LIN-3 in purple, Wnts in orange, plexin in green and Delta in light blue. A question mark indicates that the effect of removing this signal is not known. Note that in addition the sex myoblasts left and right of the AC express *lin-44/Wnt*.

## Supplementary figure legends

### Figure S1. Dissecting microscope pictures of wild-type and mutant *O. tipulae* adult hermaphrodites.

WT: wild-type. *Oti-lin-3(mf86)*: fully-penetrant egg-laying defective, forming a bag of worms. *Oti-mom-5(sy493)*: also partially egg-laying defective and protruding vulva. *Oti-plx-1(mf78)*: protruding vulva. All the images are set to the same scale. Scale bar: 100 micrometers.

### Figure S2. Example of mapping-by-sequencing in *O. tipulae*.

Graphs showing the frequency of JU170 calls for single-nucleotide polymorphisms between CEW1 (reference wild isolate, on which the mutagenesis was conducted) and JU170 (alternative wild isolate used for mapping) along scaffold 10 of genome assembly nOt.2.0, for two alleles of the *cov-4* locus, called *sy465* and *sy493*. The location of *Oti-mom-5* is marked by a grey line. See (Besnard *et al.* 2017) for further details.

### Figure S3. Single-molecule FISH of Wnt genes *Oti-cwn-1* and *Oti-cwn-2*.

Wnt mRNAs are visible as green dots. The animals were also labeled with DAPI (in blue), labeling nuclei. *Oti-cwn-1* is visible only at the posterior part of the animal (green arrows), while *Oti-cwn-2* mRNAs (green arrows) appear in the pharynx and the anterior part of the animal. All the images are set to the same scale. The size of the bar is 10 micrometers.

### Figure S4. Phylogenetic relationship between Wnt genes inside and outside the *Caenorhabditis* clade.

The cladograms were inferred using the Neighbor-Joining method with 1000 replicates for bootstrapping. The percentage of replicate trees in which the associated taxa clustered together in the bootstrap test are shown next to the branches. Evolutionary analyses were conducted in MEGA X. Abbreviations: Cbr (*C. briggsae*), Cel (*C. elegans*), Cjp (*C. japonica*), Dmel (*Drosophila melanogaster*), Oti (*O. tipulae*), Ovo (*Onchocerca volvulus*).

### Figure S5. Identification and phylogentic relationships of Delta/Serrate/Lag-2 (DSL) proteins in *O. tipulae*.

**Top panel:** Cladogram inferred using the Neighbor-Joining method with 1000 replicates for bootstrapping. Abbreviations: Cbr (*C. briggsae*), Cel (*C. elegans*), Cjp (*C. japonica*), Dm (*Drosophila melanogaster*), Oti (*O. tipulae*), Ppa (*Pristionchus pacificus*).

**Bottom panel:** Alignment of the delta motif used to calculate the molecular distances between DSL proteins.

**Figure S6. Expression profile of *Oti-lin-44* revealed by smFISH.**

L3 stage larva of *O. tipulae* CEW1 larva in two focal planes. (A) Staining is visible in the tail and the daughters of P6.p in the mid-focal plane. (B) Staining is visible in the cytoplasm of a sex myoblast in a lateral focal plane.

**Figure S7. Expression profile of *Cel-lin-44* revealed by smFISH.**

**Top panel:** Z cuts of a L3 stage *C. elegans* N2 larva labelled with DAPI (blue) and smFISH probes for *lag-2* (red) and for *lin-44* (green). Each image is separated by 0.7 microns. The images were annotated when certain features were in focus, i.e. left/right distal tip cells (DT) - anchor cell (AC).

**Bottom panel:** Enlarged set of images revealing the expression of *lin-44* in the sex myoblast (SM, green arrows) and the daughters of P6.p (grey arrow), but not in the AC (red arrow).

## Supplementary tables

**Table S1. List of strains used in this study.**

**Table S2. Sequences of DNA primers used in this study.**

Sequencing primers to verify by Sanger sequencing the mutations identified by the mapping by sequencing approach, and to identify the molecular lesion in additional alleles.

**Table S3. Sequences of smFISH probes used in this study.**

The fluorophore coupled to each probe is noted at the end of the set name.

**Table S4. smFISH quantifications, distance measurements and vulval cell fates used in this study.**

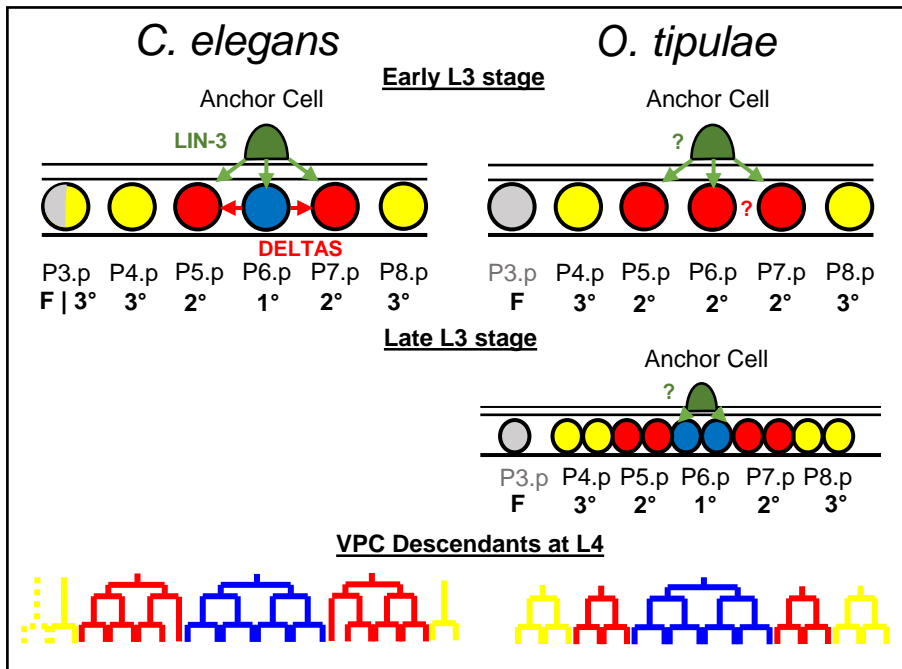

Figure 1

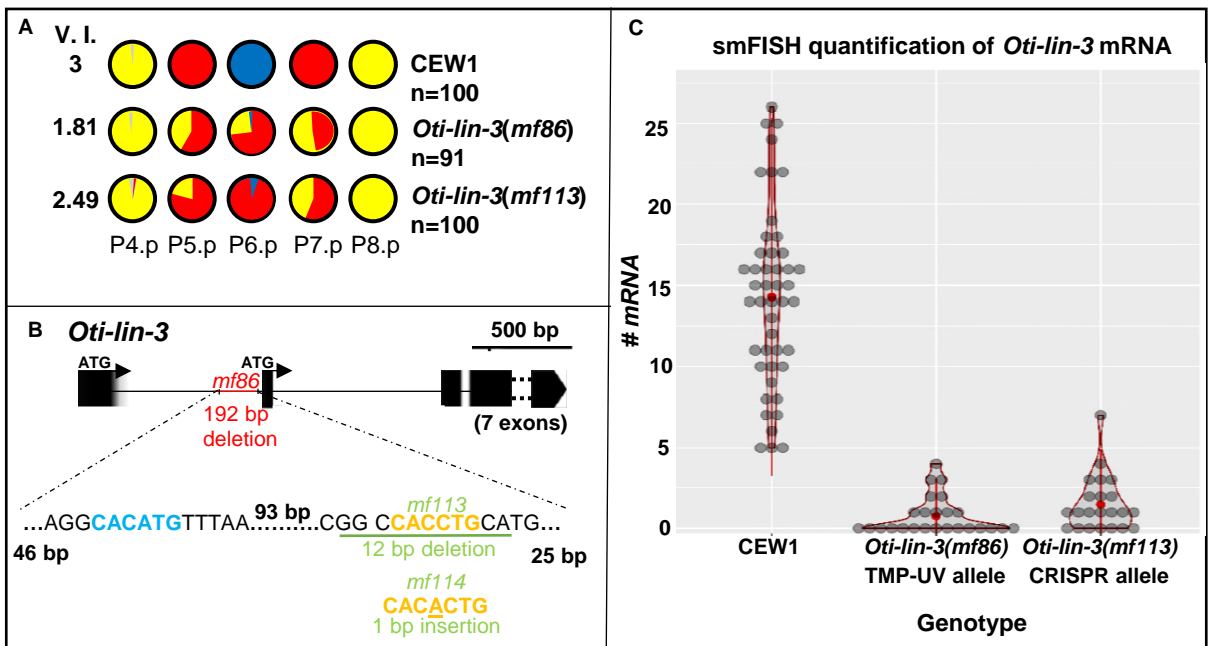

**Figure 2**

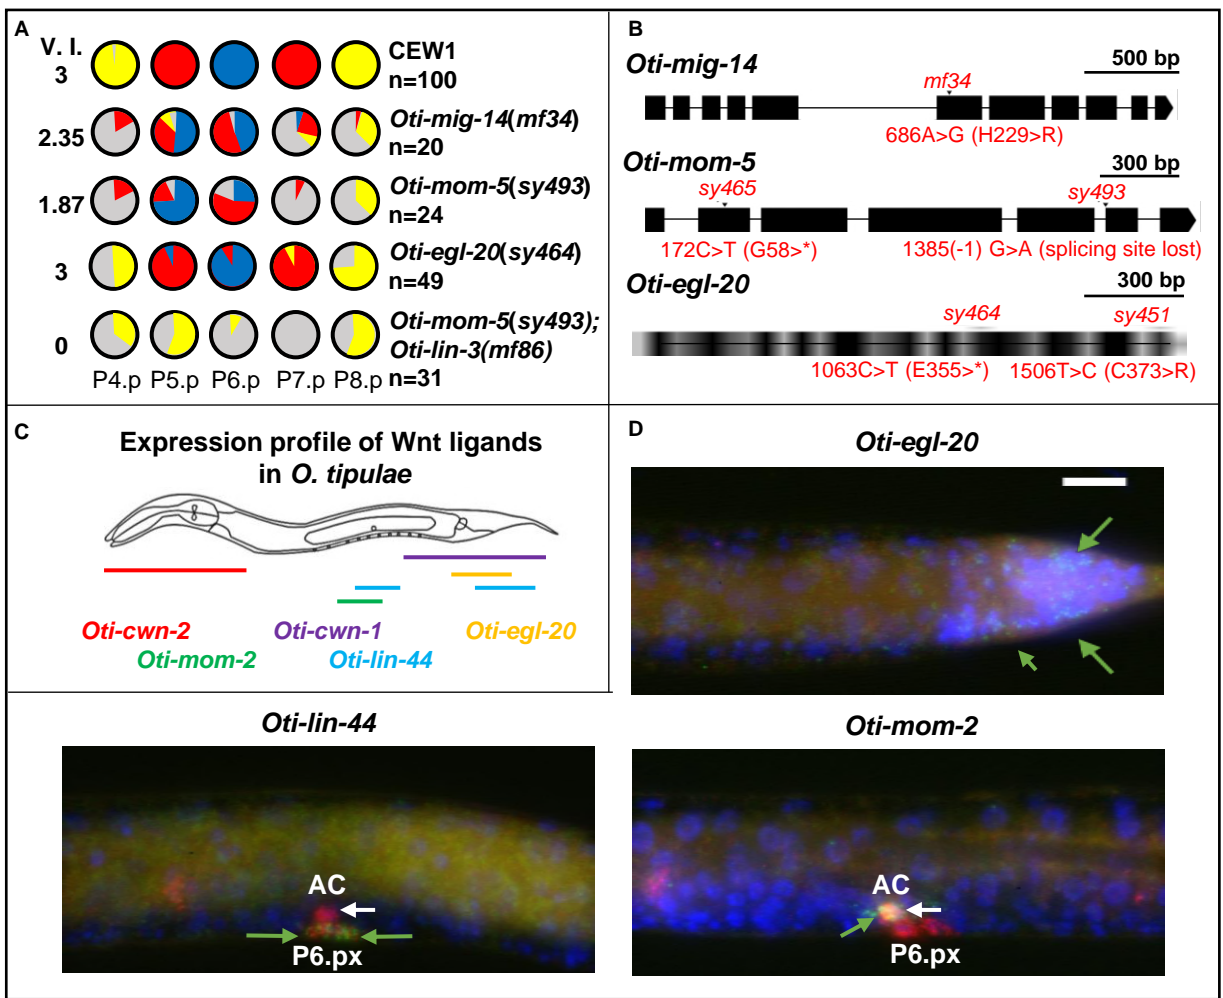

Figure 3

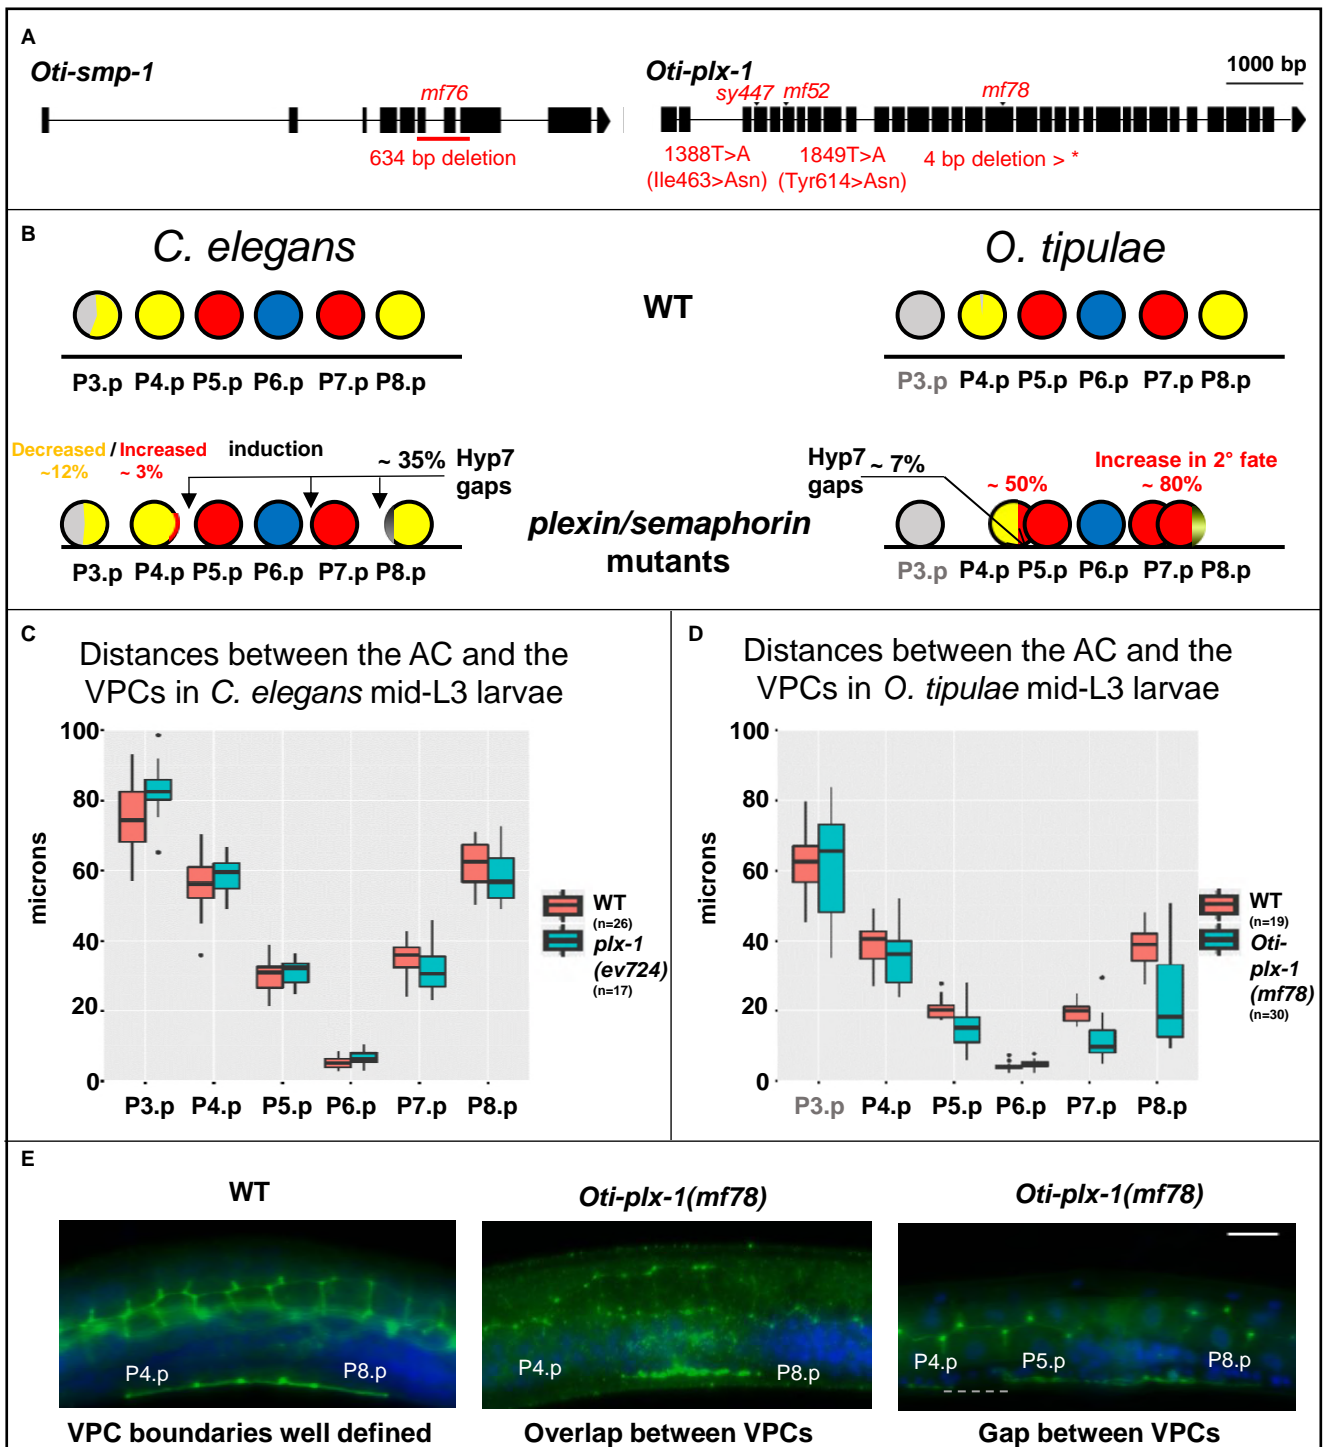

Figure 4



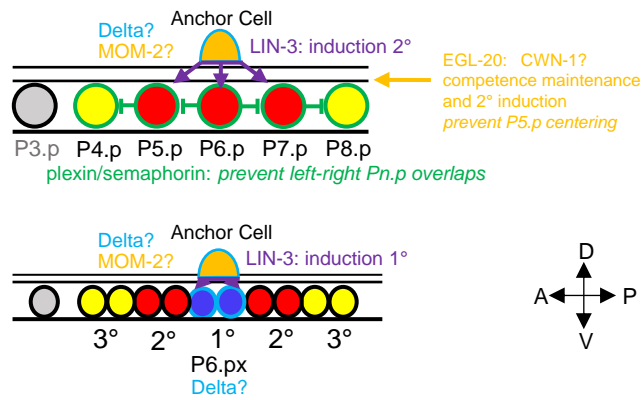

Figure 5

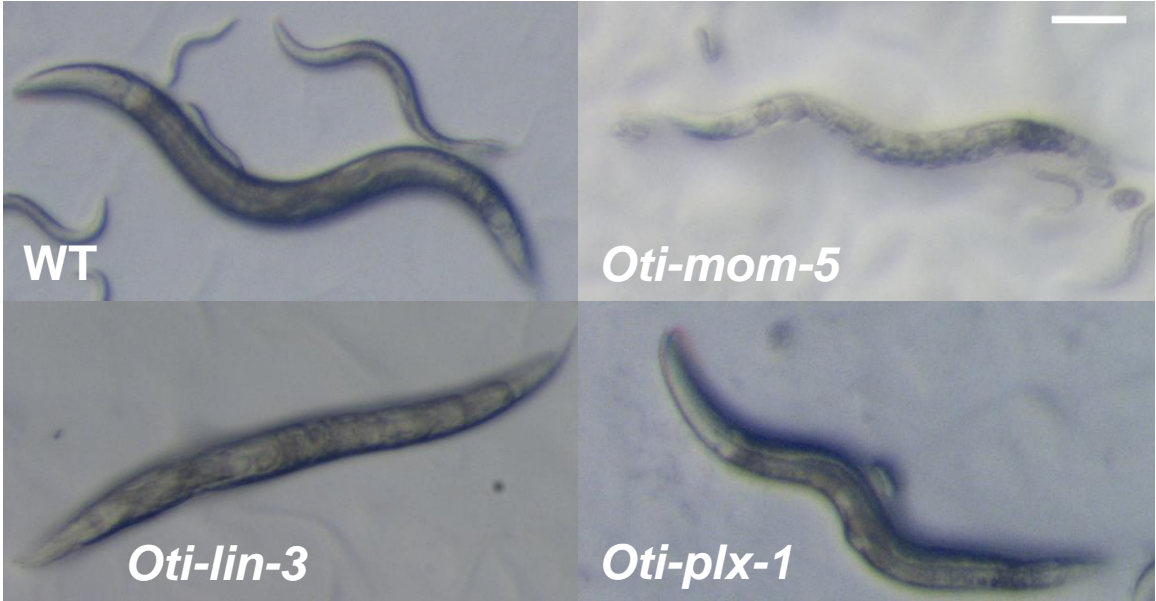

**Figure S1**

# *cov-4(sy465)* – Scaffold 10

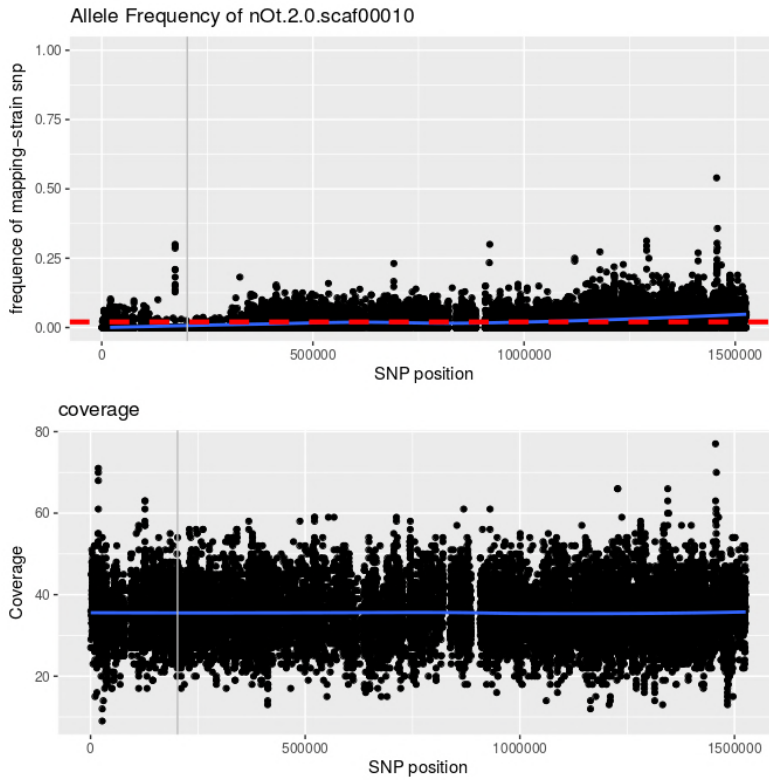

# *cov-4(sy493)* – Scaffold 10

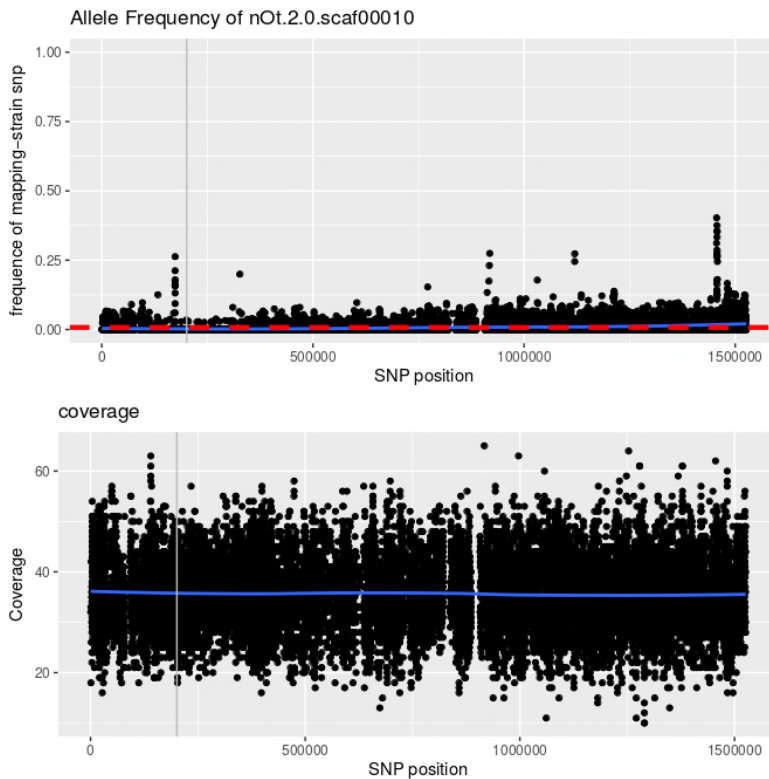

**Figure S2**

DAPI / *Oti-cwn-1*

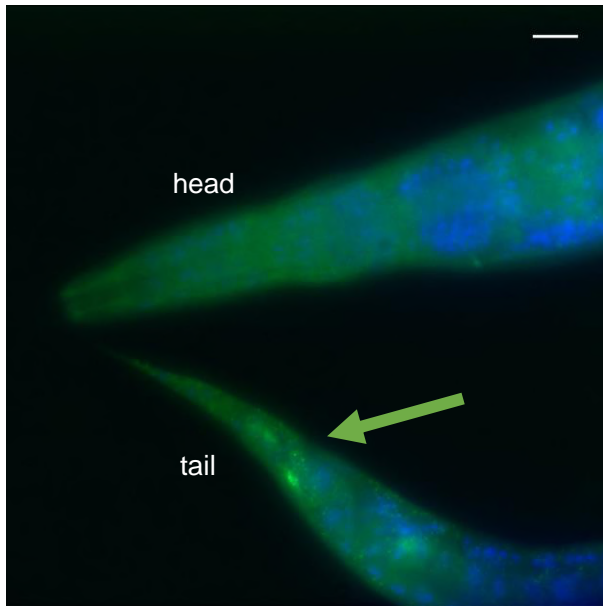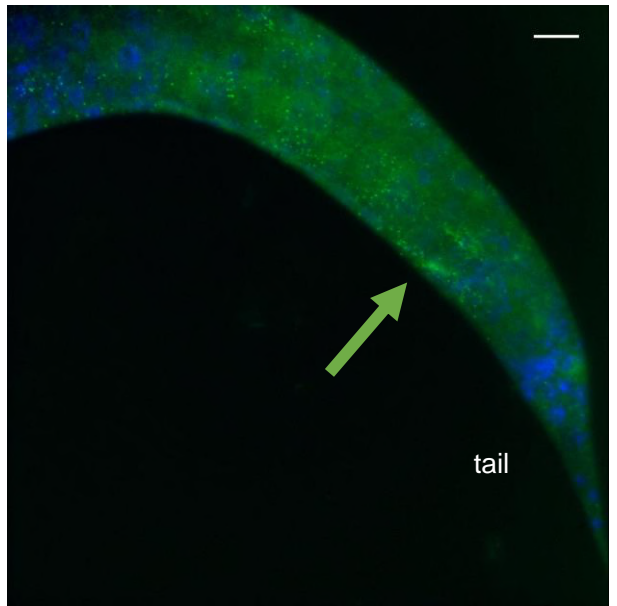

DAPI / *Oti-cwn-2*

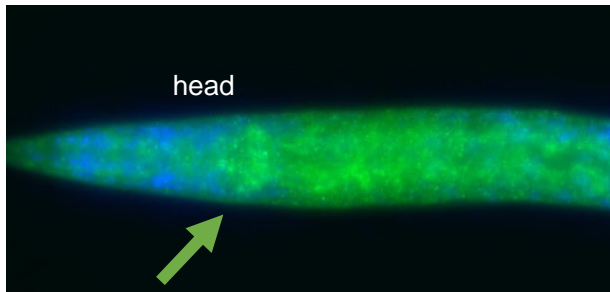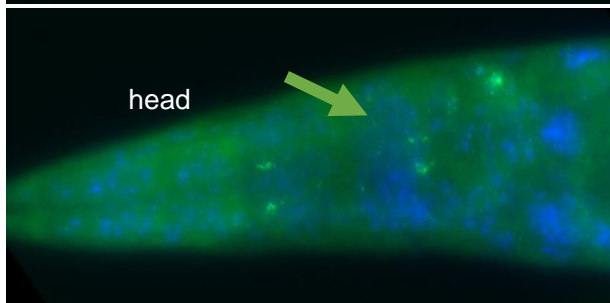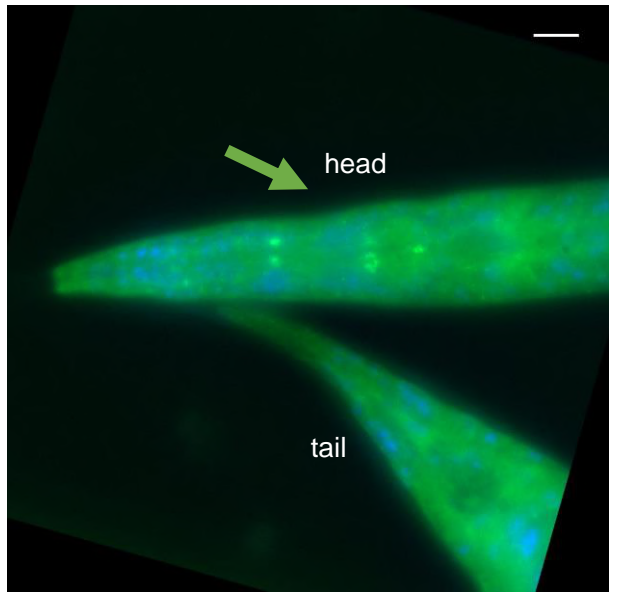

Figure S3

# Wnt

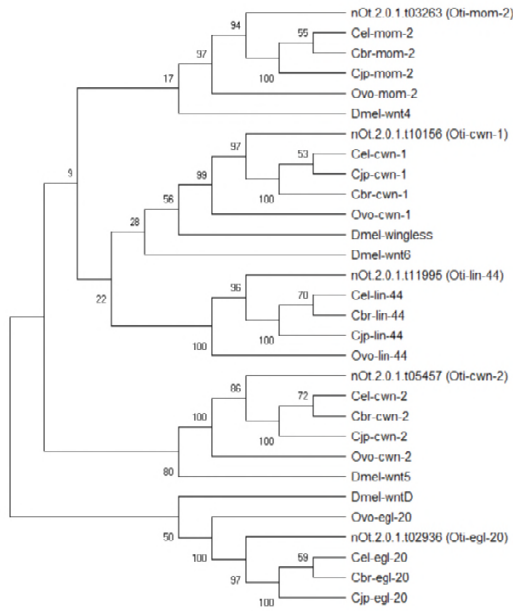

# Wnt receptors

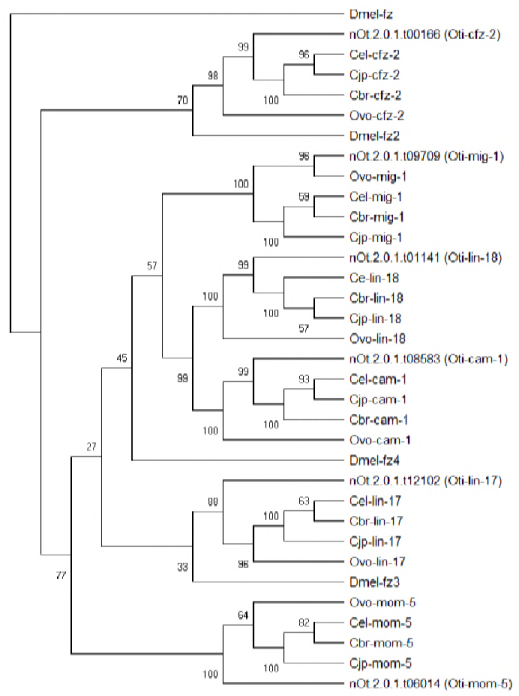

Figure S4

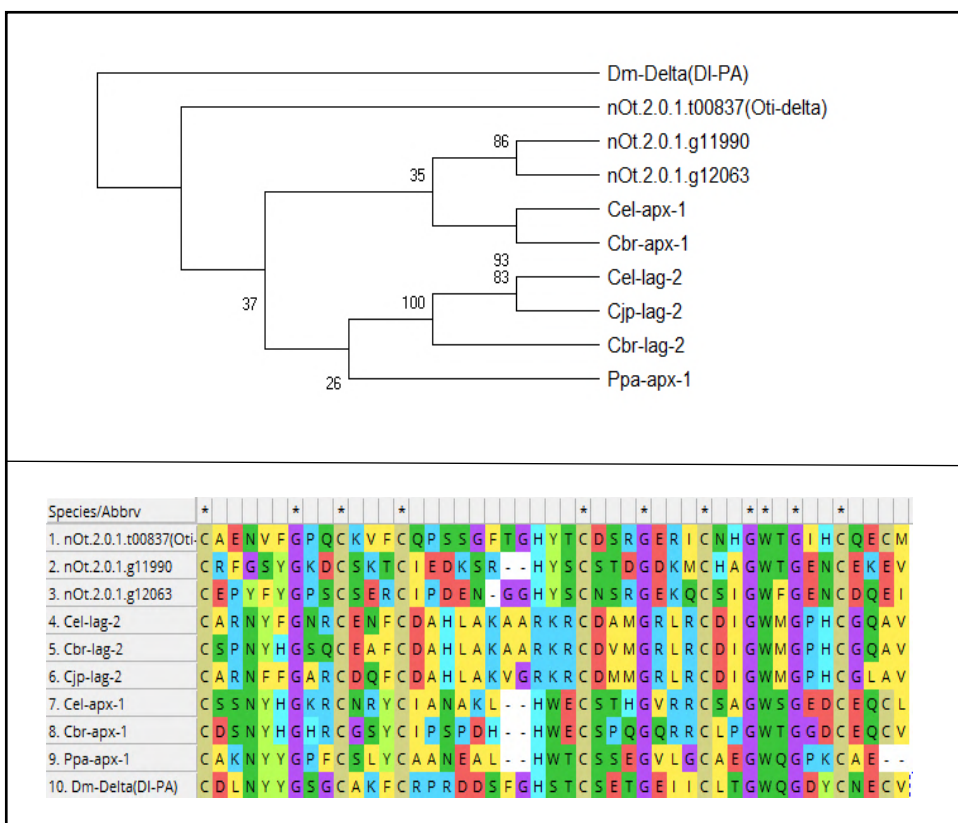

**Figure S5**

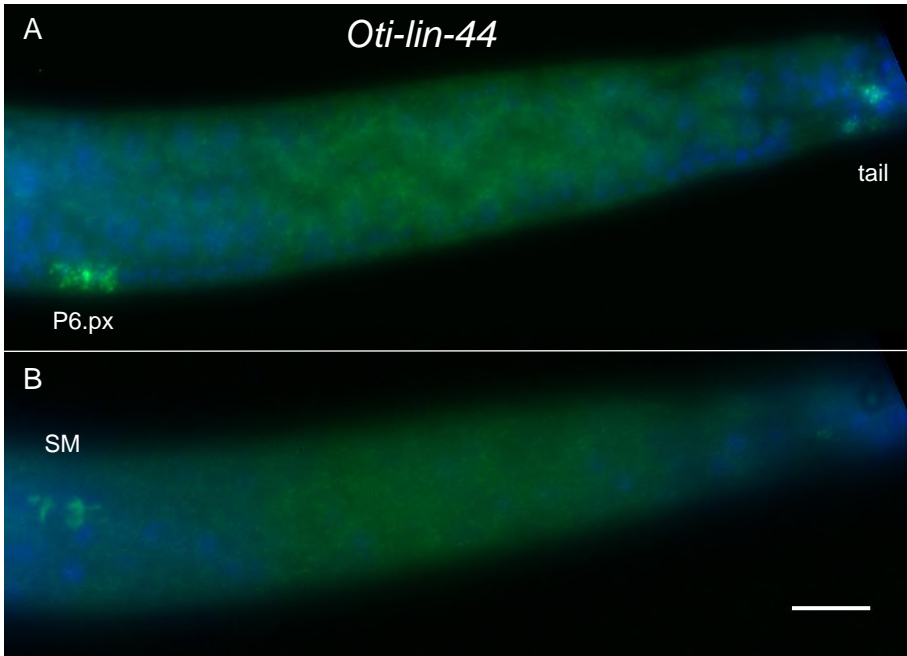

**Figure S6**



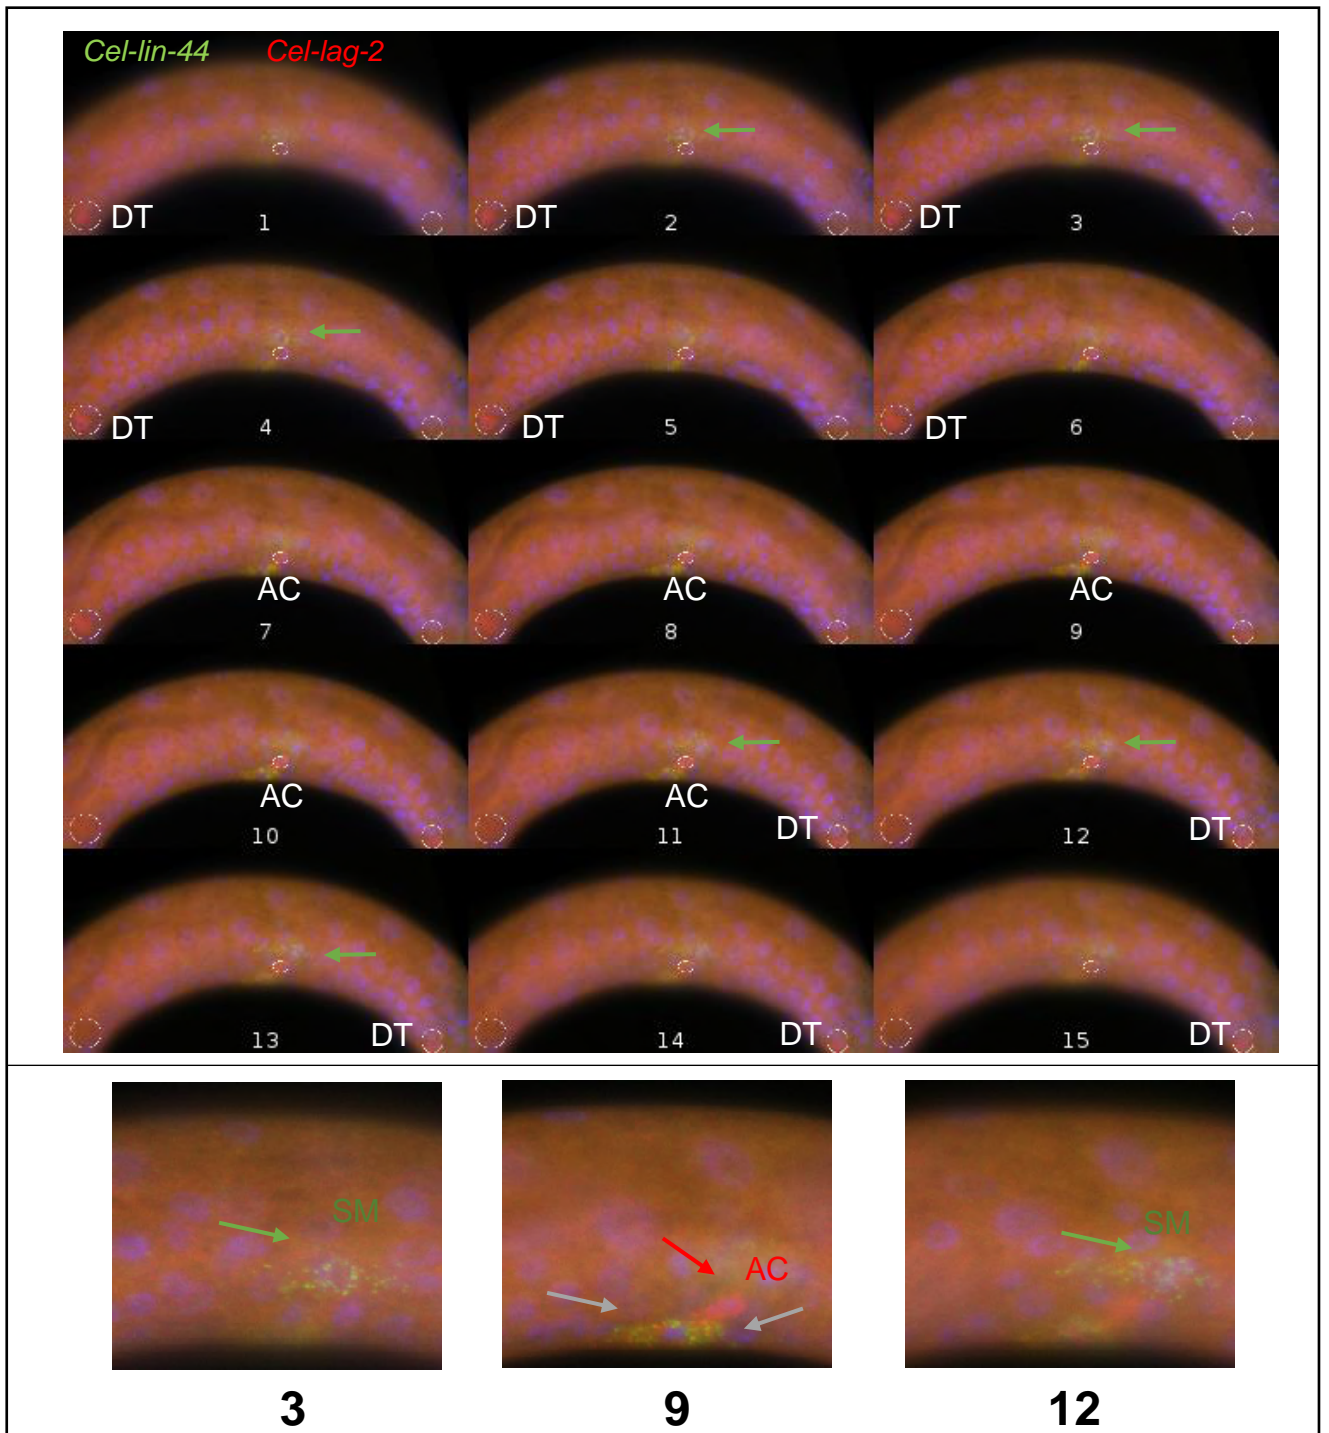

**Figure S7**
